# Supplementary material
Source: PubMed Central journal article supplement (PMC3475381)
Supplement: ismej201235x1.pdf [file ismej201235x1.pdf]

# Supplementary Information

for

## Comparison of large-insert, small-insert, and pyrosequencing libraries for metagenomic analysis

Thomas Danhorn   Curtis R. Young   Edward F. DeLong

Department of Civil and Environmental Engineering  
Massachusetts Institute of Technology,  
Cambridge, MA 02139

### Effects of library choice on the perceived diversity of the sampled community

Supplementary Table 1 Diversity measures of libraries

| Cruise               | Depth | Species Richness |         |      | Effective Species from Shannon Entropy |         |       |
|----------------------|-------|------------------|---------|------|----------------------------------------|---------|-------|
|                      |       | Fosmid Ends      | Shotgun | 454  | Fosmid Ends                            | Shotgun | 454   |
| HOT 179              | 25 m  | 729              | 1282    | 1240 | 121.6                                  | 31.4    | 12.2  |
|                      | 75 m  | 753              | 1127    | 1224 | 88.0                                   | 10.5    | 8.9   |
|                      | 125 m | 930              | 1314    | 1293 | 150.3                                  | 40.0    | 25.0  |
|                      | 500 m | 894              | 1365    | 1367 | 160.0                                  | 96.3    | 141.9 |
| HOT 186              | 25 m  | 752              | 1011    | 1487 | 98.8                                   | 32.7    | 27.1  |
|                      | 75 m  | 702              | 895     | 1495 | 100.7                                  | 14.1    | 21.4  |
|                      | 110 m | 643              |         | 1477 | 13.7                                   |         | 33.6  |
|                      | 500 m | 914              |         | 1620 | 176.9                                  |         | 98.0  |
| HOT 179 <sup>a</sup> | 125 m | 1108             | 738     | 768  | 97.3                                   | 23.6    | 24.1  |

<sup>a</sup>Test for effects of read length and library size. Fosmid ends and shotgun reads were split to have the same average length as 454 reads. Shotgun and 454 data are random subsets with the same number of assigned reads as the fosmid library with split reads.

To assess if the choice of sequencing library affects the observed taxonomic diversity, we calculated both the species richness and the effective number of species using the Shannon entropy (for an overview of diversity measures and their relationship see Jost, 2006). The former is simply the number of different taxa, whereas the latter takes their relative abundance into account to calculate the diversity in equivalents of equally common species. Since MEGAN assigns BLAST hits not only to species but also to higher taxa, we chose to treat those equivalent to species, with the exception of the root of the taxonomic tree as well as the non-hits and unassigned reads, which were removed

before the calculation. The results are summarized in Supplementary Table 1. As a result of the smaller library sizes (Table 1 in main text), the fosmid ends data sets had somewhat lower species richness than shotgun and 454. For almost all samples, however, the fosmid libraries showed a much higher number of effective species. This is primarily a result of the reduction of highly dominant species such as the *Prochlorococcus* strains due to their GC content, which in turn increased the relative concentration of all other taxa, and a more even distribution resulted in a greater number of effective species, which is a measure of diversity. A notable exception was the fosmid library of HOT 186–110 m with only 13.4 effective species, which was consistent with the atypical taxonomic composition of this library—possibly the result of an aberration in its construction (see “Taxonomic composition of the data sets” in the main text, as well as Supplementary Table 8 and Supplementary Figure 2). While the higher diversity is a potentially beneficial side effect of the biased composition of fosmid libraries, their cost and comparatively small size limit their usefulness for capturing the largest possible cross section of a microbial community.

To show the influence of read length and library size on the calculation of the diversity measures, the last line in Supplementary Table 1 shows the effect of randomly splitting the fosmid and shotgun sequences of the HOT 179–125 m data set as described in section “GC content and bias” of the main text into chunks approximately equal to the length of the 454 reads and selecting random subsets from the 454 and the split shotgun library to achieve the same number of assigned BLAST hits as for the split fosmid sequences. The species richness is strongly correlated with the library size (compare the fosmid results, where splitting increases the number of reads, to the 454 numbers, where only a subset is used), while the read length has a smaller effect (the shotgun results are only slightly more reduced than 454 results). The Shannon Entropy-based measure is much less sensitive to the library size changes (compare the 454 results). Shorter read lengths do decrease the absolute numbers for fosmids and shotgun libraries, but the higher diversity in the fosmid library relative to the others when using Shannon Entropy is robust to changes in both library size and read length.

## References

Jost L. (2006). Entropy and diversity. *Oikos* **113**: 363–375.

## Tables

### *List of Tables*

|    |                                                                             |    |
|----|-----------------------------------------------------------------------------|----|
| 1  | Diversity measures of libraries . . . . .                                   | 1  |
| 2  | Archive information for sequence libraries . . . . .                        | 4  |
| 3  | Prevalence and GC content in HOT 179, 25–75 m ( <b>blastn</b> ) . . . . .   | 5  |
| 4  | Prevalence and GC content in HOT 179, 125–500 m ( <b>blastn</b> ) . . . . . | 6  |
| 5  | Prevalence and GC content in HOT 179, 25–75 m ( <b>blastx</b> ) . . . . .   | 7  |
| 6  | Prevalence and GC content in HOT 179, 125–500 m ( <b>blastx</b> ) . . . . . | 8  |
| 7  | Prevalence and GC content in HOT 186, 25–75 m ( <b>blastn</b> ) . . . . .   | 9  |
| 8  | Prevalence and GC content in HOT 186, 110–500 m ( <b>blastn</b> ) . . . . . | 10 |
| 9  | Prevalence and GC content in HOT 186, 25–75 m ( <b>blastx</b> ) . . . . .   | 11 |
| 10 | Prevalence and GC content in HOT 186, 110–500 m ( <b>blastx</b> ) . . . . . | 12 |
| 11 | KEGG orthologs biased against Fosmid Ends . . . . .                         | 13 |
| 12 | KEGG orthologs biased in favor of Fosmid Ends . . . . .                     | 13 |
| 13 | KEGG orthologs biased in favor of Shotgun . . . . .                         | 15 |
| 14 | KEGG orthologs biased against 454 . . . . .                                 | 15 |
| 15 | KEGG orthologs biased in favor of 454 . . . . .                             | 24 |

**Supplementary Table 2** Archive information for sequence libraries

| <i>Cruise</i> | <i>Depth</i>  | <i>Library Type</i>  | <i>Vector</i>                                | <i>Database</i>                              | <i>Accession or TI Numbers</i> |
|---------------|---------------|----------------------|----------------------------------------------|----------------------------------------------|--------------------------------|
| HOT 179       | Fosmid Ends   | pCC1FOS              | CAMERA                                       | CAM_P_0000828                                |                                |
|               | 25 m Shotgun  | pUC18                | NCBI Trace Archive                           | 2242553305–2242566360, 2242586814–2242715268 |                                |
|               | 454           | —                    | NCBI Seq. Read Arch.                         | SRX002155                                    |                                |
|               | Fosmid Ends   | pCC1FOS              | CAMERA                                       | CAM_P_0000828                                |                                |
|               | 75 m Shotgun  | pUC18                | NCBI Trace Archive                           | 2242740565–2242890189                        |                                |
|               | 454           | —                    | NCBI Seq. Read Arch.                         | SRX000174                                    |                                |
|               | Fosmid Ends   | pCC1FOS              | CAMERA                                       | CAM_P_0000828                                |                                |
|               | 125 m Shotgun | pUC18                | NCBI Trace Archive                           | 2242890190–2243042992                        |                                |
|               | 454           | —                    | NCBI Seq. Read Arch.                         | SRX002157                                    |                                |
|               | Fosmid Ends   | pCC1FOS              | CAMERA                                       | CAM_P_0000828                                |                                |
| 500 m Shotgun | pUC18         | NCBI Trace Archive   | 2243042993–2243052976, 2243078729–2243218158 |                                              |                                |
| 454           | —             | NCBI Seq. Read Arch. | SRX002159                                    |                                              |                                |
| HOT 186       | Fosmid Ends   | pCC1FOS              | CAMERA                                       | CAM_P_0000828                                |                                |
|               | 25 m Shotgun  | pUC18                | NCBI Trace Archive                           | 2281908320–2281966591                        |                                |
|               | 454           | —                    | NCBI Seq. Read Arch.                         | SRX007372                                    |                                |
|               | Fosmid Ends   | pCC1FOS              | CAMERA                                       | CAM_P_0000828                                |                                |
|               | 75 m Shotgun  | pUC18                | NCBI Trace Archive                           | 2281966592–2282003263, 2282006336–2282042335 |                                |
|               | 454           | —                    | NCBI Seq. Read Arch.                         | SRX007369                                    |                                |
|               | Fosmid Ends   | pCC1FOS              | CAMERA                                       | CAM_P_0000828                                |                                |
|               | 110 m Shotgun | pUC18                | NCBI Trace Archive                           | 2281966592–2282003263, 2282006336–2282042335 |                                |
|               | 454           | —                    | NCBI Seq. Read Arch.                         | SRX007370                                    |                                |
|               | Fosmid Ends   | pCC1FOS              | CAMERA                                       | CAM_P_0000828                                |                                |
| 500 m Shotgun | pUC18         | NCBI Trace Archive   | 2281966592–2282003263, 2282006336–2282042335 |                                              |                                |
| 454           | —             | NCBI Seq. Read Arch. | SRX007371                                    |                                              |                                |

**Supplementary Table 3** Prevalence and GC content of taxonomic groups in HOT 179 sequencing libraries at 25–75 m using blastn

| Taxa                | 25m                |      |                 |                    |      |                 | 75m                |      |                 |                    |      |                 |      |      |      |      |      |      |
|---------------------|--------------------|------|-----------------|--------------------|------|-----------------|--------------------|------|-----------------|--------------------|------|-----------------|------|------|------|------|------|------|
|                     | Fosmid Ends        |      |                 | Shotgun            |      |                 | Fosmid Ends        |      |                 | Shotgun            |      |                 |      |      |      |      |      |      |
|                     | % Rd. <sup>a</sup> | % GC | SD <sup>b</sup> | % Rd. <sup>a</sup> | % GC | SD <sup>b</sup> | % Rd. <sup>a</sup> | % GC | SD <sup>b</sup> | % Rd. <sup>a</sup> | % GC | SD <sup>b</sup> |      |      |      |      |      |      |
| Bacteria            | 85.4               | 46.8 | 13.0            | 93.5               | 34.9 | 9.7             | 97.2               | 32.7 | 8.5             | 91.0               | 43.7 | 12.0            | 97.8 | 32.8 | 6.7  | 98.4 | 32.2 | 7.7  |
| Actinobacteria      | 3.7                | 61.7 | 7.4             | 0.7                | 61.4 | 8.2             | 0.3                | 64.3 | 10.2            | 2.3                | 60.2 | 8.1             | 0.2  | 59.1 | 9.9  | 0.1  | 62.2 | 10.6 |
| Bacteroidetes       | 2.6                | 41.1 | 9.8             | 2.6                | 34.4 | 7.5             | 1.3                | 34.6 | 7.6             | 2.6                | 37.5 | 6.4             | 1.3  | 32.9 | 5.5  | 0.8  | 34.1 | 6.8  |
| Flavobacteria       | 1.8                | 38.4 | 8.2             | 2.2                | 33.0 | 5.2             | 1.1                | 34.0 | 7.0             | 2.0                | 36.9 | 5.9             | 1.2  | 32.4 | 4.6  | 0.7  | 33.8 | 6.5  |
| Cyanobacteria       | 30.1               | 39.8 | 12.9            | 53.8               | 32.8 | 7.0             | 77.3               | 31.9 | 7.3             | 38.9               | 37.3 | 11.1            | 78.5 | 32.1 | 5.5  | 83.9 | 31.8 | 7.1  |
| Chroococcales       | 7.6                | 58.6 | 7.3             | 2.7                | 55.4 | 10.7            | 1.8                | 54.5 | 13.2            | 7.3                | 57.7 | 6.4             | 1.5  | 55.1 | 10.4 | 1.4  | 57.0 | 10.3 |
| Prochlorales        | 22.3               | 32.5 | 4.7             | 50.8               | 31.7 | 4.2             | 75.2               | 31.3 | 6.2             | 31.1               | 32.4 | 4.6             | 76.8 | 31.7 | 4.3  | 82.3 | 31.4 | 6.3  |
| Firmicutes          | 2.5                | 41.2 | 7.6             | 1.8                | 34.4 | 8.2             | 1.0                | 32.8 | 8.1             | 2.7                | 39.6 | 7.4             | 0.9  | 33.1 | 7.1  | 0.7  | 32.6 | 8.2  |
| Proteobacteria      | 35.7               | 51.1 | 11.1            | 26.6               | 36.2 | 11.2            | 14.8               | 35.4 | 11.3            | 33.1               | 49.5 | 10.2            | 13.9 | 35.8 | 10.0 | 10.9 | 34.4 | 9.9  |
| Alphaproteobacteria | 15.5               | 50.5 | 11.5            | 20.0               | 33.5 | 9.1             | 11.7               | 33.4 | 9.5             | 13.7               | 49.6 | 10.6            | 9.0  | 33.1 | 8.3  | 8.8  | 32.8 | 8.5  |
| Rhizobiales         | 2.9                | 56.7 | 9.9             | 0.7                | 50.0 | 12.9            | 0.3                | 51.1 | 14.2            | 2.7                | 54.3 | 8.3             | 0.3  | 46.8 | 12.5 | 0.2  | 49.5 | 13.7 |
| Rhodobacterales     | 3.7                | 50.1 | 9.7             | 0.9                | 46.6 | 9.9             | 0.4                | 49.9 | 11.2            | 3.3                | 50.7 | 8.9             | 0.4  | 46.3 | 9.1  | 0.2  | 49.3 | 10.7 |
| Rickettsiales       | 2.7                | 34.1 | 5.3             | 16.8               | 30.5 | 4.2             | 10.4               | 31.1 | 5.8             | 2.7                | 34.4 | 5.7             | 7.7  | 30.5 | 4.3  | 8.0  | 31.2 | 5.9  |
| SAR11 cluster       | 2.3                | 33.4 | 5.0             | 16.3               | 30.4 | 4.1             | 10.0               | 31.0 | 5.8             | 2.1                | 33.7 | 5.0             | 7.3  | 30.4 | 4.2  | 7.7  | 31.1 | 5.9  |
| Betaproteobacteria  | 3.9                | 59.3 | 9.3             | 0.9                | 55.8 | 12.5            | 0.4                | 57.2 | 13.7            | 2.6                | 56.4 | 9.0             | 1.7  | 48.1 | 8.4  | 0.2  | 53.2 | 14.5 |
| Burkholderiales     | 3.1                | 60.0 | 9.0             | 0.7                | 58.7 | 10.3            | 0.3                | 61.1 | 11.0            | 2.1                | 57.4 | 8.5             | 1.6  | 48.3 | 8.0  | 0.1  | 58.6 | 12.3 |
| Gammaproteobacteria | 9.9                | 47.8 | 9.7             | 3.6                | 42.1 | 11.1            | 1.7                | 41.0 | 11.7            | 9.9                | 46.0 | 8.8             | 2.1  | 40.0 | 9.9  | 1.2  | 39.9 | 10.8 |
| Alteromonadales     | 1.7                | 43.8 | 8.0             | 0.6                | 37.9 | 8.6             | 0.3                | 39.1 | 9.5             | 1.6                | 44.0 | 8.5             | 0.3  | 37.5 | 7.9  | 0.2  | 37.9 | 9.7  |
| Enterobacteriales   | 1.0                | 45.8 | 8.5             | 0.8                | 42.8 | 12.0            | 0.2                | 35.6 | 11.2            | 1.3                | 46.5 | 10.2            | 0.3  | 35.2 | 8.1  | 0.2  | 35.8 | 10.4 |
| Deltaproteobacteria | 1.8                | 58.3 | 8.6             | 0.4                | 55.8 | 12.8            | 0.1                | 54.7 | 15.1            | 2.0                | 57.0 | 8.7             | 0.1  | 54.5 | 12.0 | 0.1  | 51.2 | 16.6 |
| Archaea             | 1.3                | 51.2 | 9.6             | 0.4                | 39.3 | 12.2            | 0.2                | 36.0 | 14.9            | 1.0                | 47.0 | 10.4            | 0.2  | 37.3 | 11.9 | 0.2  | 33.5 | 13.5 |
| Euryarchaeota       | 1.1                | 51.4 | 10.3            | 0.3                | 39.9 | 12.4            | 0.2                | 36.7 | 15.4            | 0.9                | 47.2 | 10.6            | 0.2  | 38.0 | 12.6 | 0.1  | 33.5 | 14.0 |
| Thaumarchaeota      | —                  | —    | —               | 0.0                | 32.5 | 6.5             | 0.0                | 28.9 | 6.8             | 0.0                | 31.0 | 1.7             | 0.0  | 33.5 | 4.9  | 0.0  | 32.8 | 8.4  |
| Eukaryota           | 7.2                | 50.8 | 11.7            | 3.0                | 40.3 | 13.4            | 1.1                | 32.9 | 14.1            | 3.6                | 48.6 | 12.4            | 1.0  | 36.2 | 12.7 | 0.7  | 29.3 | 12.2 |
| Fungi               | 3.2                | 54.0 | 10.4            | 1.2                | 48.8 | 10.6            | 0.3                | 43.1 | 14.9            | 1.6                | 53.6 | 10.1            | 0.2  | 45.2 | 13.0 | 0.2  | 38.5 | 15.3 |
| Viruses             | 2.3                | 41.0 | 9.2             | 1.9                | 36.1 | 5.0             | 1.1                | 36.6 | 6.7             | 2.4                | 39.4 | 7.1             | 0.4  | 36.7 | 5.8  | 0.4  | 36.4 | 6.3  |
| Caudovirales        | 1.9                | 37.9 | 4.4             | 1.9                | 36.0 | 3.9             | 1.0                | 36.5 | 5.8             | 2.2                | 38.1 | 4.8             | 0.4  | 36.3 | 4.2  | 0.4  | 36.6 | 5.8  |

<sup>a</sup>Percentage of reads assigned to a taxon<sup>b</sup>Standard deviation of the GC content for each taxon (weighted by read length)

**Supplementary Table 4** Prevalence and GC content of taxonomic groups in HOT 179 sequencing libraries at 125–500 m using blastn

| Taxa                | 125 m              |      |                 |                    |      |                 | 500 m              |      |                 |                    |      |                 |      |      |      |
|---------------------|--------------------|------|-----------------|--------------------|------|-----------------|--------------------|------|-----------------|--------------------|------|-----------------|------|------|------|
|                     | Fosmid Ends        |      |                 | Shotgun            |      |                 | Fosmid Ends        |      |                 | Shotgun            |      |                 |      |      |      |
|                     | % Rd. <sup>a</sup> | % GC | SD <sup>b</sup> | % Rd. <sup>a</sup> | % GC | SD <sup>b</sup> | % Rd. <sup>a</sup> | % GC | SD <sup>b</sup> | % Rd. <sup>a</sup> | % GC | SD <sup>b</sup> |      |      |      |
| Bacteria            | 89.7               | 45.9 | 11.2            | 95.0               | 34.1 | 8.2             | 87.3               | 53.1 | 9.8             | 77.4               | 43.1 | 12.9            | 83.6 | 45.6 | 14.4 |
| Actinobacteria      | 4.0                | 59.7 | 8.2             | 0.7                | 56.8 | 10.4            | 8.6                | 62.2 | 5.5             | 4.6                | 63.4 | 6.7             | 7.2  | 65.0 | 6.3  |
| Bacteroidetes       | 2.7                | 40.6 | 7.9             | 3.0                | 33.0 | 5.8             | 2.9                | 47.0 | 9.3             | 2.5                | 39.0 | 9.3             | 2.6  | 39.8 | 10.7 |
| Flavobacteria       | 1.9                | 38.1 | 6.3             | 2.6                | 32.5 | 5.0             | 1.1                | 40.8 | 6.7             | 1.6                | 36.4 | 6.9             | 1.7  | 36.9 | 8.7  |
| Cyanobacteria       | 25.8               | 38.0 | 9.1             | 35.5               | 33.0 | 5.8             | 1.4                | 47.4 | 9.7             | 1.8                | 39.0 | 10.2            | 1.6  | 41.0 | 12.4 |
| Chroococcales       | 3.4                | 55.5 | 7.9             | 0.8                | 50.4 | 12.2            | 0.7                | 49.9 | 9.6             | 0.5                | 44.7 | 12.3            | 0.6  | 47.3 | 12.8 |
| Prochlorales        | 21.6               | 35.1 | 5.4             | 34.5               | 32.6 | 4.8             | 0.2                | 38.2 | 6.0             | 0.9                | 33.9 | 6.5             | 0.6  | 34.3 | 8.6  |
| Firmicutes          | 4.4                | 42.6 | 8.4             | 2.8                | 33.9 | 7.3             | 4.1                | 46.9 | 9.2             | 4.0                | 39.8 | 9.4             | 4.8  | 39.9 | 11.3 |
| Proteobacteria      | 34.8               | 49.7 | 10.5            | 44.4               | 34.0 | 9.0             | 42.6               | 52.4 | 9.6             | 49.3               | 40.7 | 12.0            | 51.0 | 42.9 | 13.6 |
| Alphaproteobacteria | 13.9               | 49.4 | 11.0            | 34.4               | 32.0 | 7.2             | 13.7               | 54.3 | 9.8             | 27.7               | 36.4 | 11.4            | 28.7 | 38.9 | 13.4 |
| Rhizobiales         | 3.4                | 55.2 | 8.5             | 1.0                | 48.1 | 12.4            | 4.2                | 56.8 | 7.1             | 2.2                | 53.4 | 10.5            | 2.7  | 56.7 | 10.9 |
| Rhodobacterales     | 2.8                | 50.4 | 7.9             | 0.9                | 45.6 | 10.0            | 2.7                | 54.2 | 7.8             | 1.7                | 51.7 | 9.3             | 2.1  | 55.8 | 9.5  |
| Rickettsiales       | 3.0                | 33.9 | 5.4             | 31.1               | 30.4 | 4.2             | 1.6                | 35.7 | 4.1             | 21.2               | 31.1 | 4.4             | 20.4 | 32.2 | 6.1  |
| SAR11 cluster       | 2.6                | 33.5 | 5.2             | 30.2               | 30.4 | 4.1             | 1.4                | 35.4 | 4.1             | 20.5               | 31.0 | 4.3             | 19.5 | 32.0 | 6.0  |
| Betaproteobacteria  | 2.8                | 57.9 | 8.6             | 2.8                | 49.2 | 9.6             | 4.2                | 57.0 | 7.1             | 3.9                | 53.2 | 9.5             | 2.7  | 57.2 | 10.2 |
| Burkholderiales     | 2.1                | 58.0 | 8.5             | 2.5                | 50.1 | 8.7             | 3.0                | 57.7 | 6.7             | 3.2                | 53.9 | 9.0             | 1.8  | 59.0 | 9.3  |
| Gammaproteobacteria | 10.7               | 46.5 | 8.8             | 4.4                | 40.1 | 9.7             | 13.7               | 47.2 | 8.7             | 11.2               | 43.1 | 8.5             | 12.2 | 44.7 | 10.0 |
| Alteromonadales     | 1.7                | 43.4 | 8.1             | 0.8                | 38.9 | 8.3             | 2.6                | 45.4 | 6.9             | 2.1                | 43.2 | 6.3             | 3.7  | 44.4 | 7.5  |
| Enterobacteriales   | 1.3                | 47.4 | 9.1             | 0.6                | 36.3 | 8.8             | 1.3                | 46.6 | 8.8             | 1.1                | 42.7 | 9.9             | 1.4  | 42.4 | 12.1 |
| Deltaproteobacteria | 2.2                | 58.3 | 8.6             | 0.4                | 51.8 | 11.9            | 4.0                | 56.4 | 8.2             | 1.8                | 54.0 | 9.9             | 2.2  | 57.0 | 10.3 |
| Archaea             | 2.7                | 45.5 | 9.7             | 0.9                | 36.2 | 8.5             | 8.9                | 41.5 | 10.0            | 18.5               | 36.6 | 5.1             | 11.2 | 38.0 | 7.7  |
| Euryarchaeota       | 1.8                | 48.0 | 8.9             | 0.5                | 38.2 | 10.7            | 2.5                | 54.8 | 8.6             | 1.1                | 45.2 | 12.0            | 1.2  | 43.8 | 14.1 |
| Thaumarchaeota      | 0.5                | 34.4 | 5.3             | 0.4                | 33.8 | 3.3             | 6.1                | 36.0 | 3.1             | 17.0               | 36.0 | 3.5             | 9.6  | 37.1 | 5.8  |
| Eukaryota           | 3.8                | 49.1 | 10.2            | 2.0                | 34.0 | 11.9            | 1.3                | 48.8 | 10.6            | 2.0                | 34.1 | 10.6            | 2.7  | 31.1 | 12.1 |
| Fungi               | 2.1                | 50.7 | 9.4             | 0.5                | 42.4 | 11.9            | 0.7                | 50.6 | 9.1             | 0.6                | 41.8 | 10.5            | 0.6  | 40.1 | 12.9 |
| Viruses             | 1.2                | 41.0 | 9.3             | 0.7                | 36.2 | 6.0             | 0.1                | 44.4 | 8.2             | 0.2                | 35.5 | 8.0             | 0.2  | 37.6 | 11.5 |
| Caudovirales        | 1.1                | 38.7 | 5.6             | 0.6                | 36.3 | 4.2             | 0.0                | 35.4 | 0.0             | 0.1                | 35.2 | 5.3             | 0.1  | 41.6 | 10.5 |

<sup>a</sup>Percentage of reads assigned to a taxon

<sup>b</sup>Standard deviation of the GC content for each taxon (weighted by read length)

**Supplementary Table 5** Prevalence and GC content of taxonomic groups in HOT 179 sequencing libraries at 25–75 m using blastx

| Taxa                | Depth:      |                 |                    |             |                 |                    |      |                 |                    |      |                 |      |      |      |      |      |      |      |
|---------------------|-------------|-----------------|--------------------|-------------|-----------------|--------------------|------|-----------------|--------------------|------|-----------------|------|------|------|------|------|------|------|
|                     | 25m         |                 |                    | 75m         |                 |                    |      |                 |                    |      |                 |      |      |      |      |      |      |      |
|                     | Fosmid Ends |                 | Shotgun            | Fosmid Ends |                 | Shotgun            |      |                 |                    |      |                 |      |      |      |      |      |      |      |
| % Rd. <sup>a</sup>  | % GC        | SD <sup>b</sup> | % Rd. <sup>a</sup> | % GC        | SD <sup>b</sup> | % Rd. <sup>a</sup> | % GC | SD <sup>b</sup> | % Rd. <sup>a</sup> | % GC | SD <sup>b</sup> |      |      |      |      |      |      |      |
| Bacteria            | 68.5        | 48.2            | 12.3               | 86.0        | 36.3            | 10.9               | 94.8 | 33.8            | 8.4                | 80.8 | 45.1            | 11.2 | 94.6 | 33.6 | 7.8  | 96.8 | 33.4 | 7.8  |
| Actinobacteria      | 3.2         | 54.4            | 12.1               | 1.2         | 49.4            | 13.6               | 0.3  | 45.3            | 12.4               | 3.5  | 51.1            | 11.0 | 0.6  | 48.2 | 12.3 | 0.3  | 47.2 | 11.9 |
| Bacteroidetes       | 3.5         | 46.4            | 11.5               | 3.9         | 35.5            | 10.2               | 2.2  | 34.7            | 8.6                | 2.7  | 40.2            | 9.5  | 2.3  | 32.6 | 6.1  | 1.4  | 33.0 | 6.4  |
| Flavobacteria       | 1.2         | 43.8            | 11.5               | 2.1         | 32.7            | 7.1                | 1.1  | 33.4            | 7.4                | 1.0  | 37.3            | 8.0  | 1.3  | 31.6 | 4.8  | 0.8  | 32.1 | 6.0  |
| Cyanobacteria       | 12.1        | 41.2            | 13.1               | 35.4        | 32.9            | 7.1                | 59.3 | 32.3            | 7.0                | 16.6 | 37.9            | 11.4 | 63.3 | 32.1 | 5.5  | 67.9 | 32.3 | 6.8  |
| Chroococcales       | 2.9         | 56.7            | 8.3                | 2.0         | 50.4            | 13.6               | 1.2  | 52.9            | 14.0               | 3.1  | 55.3            | 9.0  | 1.7  | 47.4 | 13.8 | 1.0  | 53.9 | 12.8 |
| Prochlorales        | 7.4         | 32.5            | 5.6                | 31.3        | 31.4            | 4.1                | 50.1 | 31.0            | 5.6                | 11.8 | 32.2            | 4.7  | 58.5 | 31.4 | 4.1  | 57.9 | 31.1 | 5.6  |
| Firmicutes          | 1.1         | 49.0            | 11.1               | 1.1         | 43.0            | 13.1               | 0.3  | 39.4            | 11.7               | 1.1  | 43.1            | 9.6  | 0.7  | 38.8 | 10.9 | 0.3  | 41.5 | 11.8 |
| Proteobacteria      | 30.1        | 48.7            | 11.6               | 32.0        | 36.7            | 11.1               | 23.4 | 35.5            | 9.8                | 36.3 | 46.5            | 10.2 | 21.5 | 36.5 | 10.1 | 18.8 | 35.2 | 9.2  |
| Alphaproteobacteria | 9.9         | 45.5            | 10.5               | 20.1        | 33.1            | 8.2                | 15.6 | 33.1            | 8.5                | 11.5 | 44.8            | 9.5  | 11.8 | 33.1 | 7.9  | 12.5 | 33.0 | 8.0  |
| Rhizobiales         | 1.8         | 48.2            | 10.7               | 2.0         | 37.3            | 10.6               | 0.6  | 39.1            | 10.7               | 2.7  | 46.7            | 9.7  | 1.4  | 36.8 | 9.5  | 0.5  | 39.4 | 10.3 |
| Rhodobacterales     | 3.6         | 42.3            | 7.5                | 3.1         | 37.8            | 7.6                | 1.5  | 40.2            | 8.1                | 3.7  | 42.8            | 7.8  | 1.7  | 37.1 | 7.4  | 1.1  | 39.9 | 8.2  |
| Rickettsiales       | 0.8         | 32.9            | 6.9                | 11.5        | 29.6            | 4.2                | 9.7  | 29.8            | 5.5                | 0.8  | 33.1            | 6.9  | 6.3  | 29.5 | 4.2  | 7.7  | 29.9 | 5.5  |
| SAR11 cluster       | 0.8         | 32.2            | 5.7                | 11.4        | 29.6            | 4.1                | 9.6  | 29.8            | 5.5                | 0.7  | 32.9            | 6.5  | 6.2  | 29.5 | 4.1  | 7.6  | 29.9 | 5.5  |
| Betaproteobacteria  | 3.1         | 60.0            | 11.0               | 1.4         | 52.1            | 14.6               | 0.4  | 47.6            | 14.1               | 2.3  | 54.1            | 12.2 | 1.8  | 45.8 | 12.1 | 0.3  | 41.7 | 11.4 |
| Burkholderiales     | 2.6         | 61.2            | 10.3               | 1.2         | 54.0            | 14.2               | 0.3  | 51.2            | 13.4               | 1.9  | 55.6            | 12.0 | 1.6  | 47.7 | 11.7 | 0.2  | 43.9 | 11.9 |
| Gammaproteobacteria | 8.2         | 46.6            | 9.6                | 5.4         | 40.6            | 10.3               | 2.4  | 42.2            | 10.7               | 11.1 | 45.0            | 9.6  | 4.3  | 39.7 | 9.8  | 1.9  | 41.9 | 10.1 |
| Alteromonadales     | 0.9         | 43.4            | 9.7                | 0.6         | 37.9            | 9.2                | 0.2  | 39.1            | 10.0               | 1.2  | 43.2            | 10.0 | 0.5  | 37.2 | 8.5  | 0.2  | 39.0 | 9.4  |
| Enterobacteriales   | 0.2         | 46.0            | 10.6               | 0.3         | 47.0            | 12.1               | 0.1  | 36.9            | 9.2                | 0.3  | 46.2            | 11.1 | 0.1  | 38.0 | 11.3 | 0.0  | 38.2 | 9.3  |
| Deltaproteobacteria | 2.7         | 55.5            | 10.9               | 1.2         | 50.0            | 13.6               | 0.2  | 43.3            | 10.7               | 3.8  | 51.5            | 9.1  | 0.8  | 47.1 | 12.7 | 0.2  | 44.3 | 11.0 |
| Archaea             | 2.9         | 50.4            | 7.0                | 0.8         | 45.6            | 10.8               | 0.2  | 45.2            | 11.0               | 2.3  | 48.8            | 6.6  | 0.3  | 42.7 | 10.2 | 0.1  | 41.0 | 10.2 |
| Euryarchaeota       | 2.5         | 50.3            | 7.0                | 0.7         | 45.6            | 10.9               | 0.1  | 44.6            | 10.9               | 1.9  | 49.0            | 6.5  | 0.3  | 42.9 | 10.3 | 0.1  | 40.7 | 10.0 |
| Thaumarchaeota      | 0.1         | 50.2            | 7.5                | 0.0         | 35.9            | 8.8                | 0.0  | 40.5            | 10.4               | 0.0  | 45.9            | 7.4  | 0.0  | 35.6 | 6.7  | 0.0  | 36.0 | 10.5 |
| Eukaryota           | 12.2        | 54.7            | 9.1                | 4.5         | 47.6            | 13.0               | 0.5  | 47.4            | 13.7               | 5.8  | 54.5            | 9.6  | 2.0  | 43.9 | 13.1 | 0.2  | 49.1 | 13.1 |
| Fungi               | 3.9         | 56.4            | 8.2                | 1.7         | 50.9            | 10.6               | 0.1  | 49.4            | 13.0               | 1.9  | 56.2            | 8.5  | 0.5  | 47.9 | 12.9 | 0.1  | 46.7 | 14.0 |
| Viruses             | 2.2         | 44.4            | 13.0               | 3.7         | 36.0            | 7.2                | 2.2  | 35.5            | 5.9                | 1.9  | 41.5            | 10.9 | 0.8  | 36.8 | 8.1  | 0.9  | 35.7 | 5.6  |
| Caudovirales        | 1.4         | 36.2            | 4.4                | 3.1         | 35.4            | 3.7                | 2.1  | 35.5            | 5.5                | 1.5  | 36.7            | 4.8  | 0.7  | 35.7 | 4.0  | 0.9  | 35.7 | 5.5  |

<sup>a</sup>Percentage of reads assigned to a taxon<sup>b</sup>Standard deviation of the GC content for each taxon (weighted by read length)

**Supplementary Table 6** Prevalence and GC content of taxonomic groups in HOT 179 sequencing libraries at 125–500 m using blastx

| Taxa                | 125 m              |      |                 |                    |      |                 | 500 m              |      |                 |                    |      |                 |      |      |      |      |      |      |
|---------------------|--------------------|------|-----------------|--------------------|------|-----------------|--------------------|------|-----------------|--------------------|------|-----------------|------|------|------|------|------|------|
|                     | Fosmid Ends        |      |                 | Shotgun            |      |                 | Fosmid Ends        |      |                 | Shotgun            |      |                 |      |      |      |      |      |      |
|                     | % Rd. <sup>a</sup> | % GC | SD <sup>b</sup> | % Rd. <sup>a</sup> | % GC | SD <sup>b</sup> | % Rd. <sup>a</sup> | % GC | SD <sup>b</sup> | % Rd. <sup>a</sup> | % GC | SD <sup>b</sup> |      |      |      |      |      |      |
| Bacteria            | 78.8               | 47.1 | 10.0            | 90.5               | 35.8 | 9.7             | 93.9               | 35.5 | 8.9             | 81.7               | 51.6 | 9.4             | 77.2 | 43.9 | 11.8 | 77.3 | 46.0 | 12.5 |
| Actinobacteria      | 5.6                | 49.5 | 8.5             | 1.9                | 46.8 | 10.4            | 0.9                | 45.5 | 9.7             | 4.4                | 59.7 | 8.6             | 3.6  | 59.9 | 10.4 | 3.2  | 62.7 | 9.2  |
| Bacteroidetes       | 2.6                | 43.5 | 9.7             | 4.0                | 33.3 | 7.8             | 2.0                | 33.9 | 7.7             | 3.8                | 46.2 | 9.2             | 3.2  | 40.2 | 9.2  | 1.7  | 42.2 | 10.1 |
| Flavobacteria       | 0.7                | 39.5 | 8.3             | 1.9                | 31.6 | 5.9             | 0.9                | 32.6 | 6.4             | 0.8                | 45.5 | 9.5             | 0.8  | 37.2 | 8.9  | 0.5  | 38.9 | 9.3  |
| Cyanobacteria       | 9.4                | 39.0 | 9.6             | 21.6               | 33.1 | 6.1             | 35.7               | 33.5 | 7.0             | 1.3                | 51.6 | 9.0             | 1.3  | 41.2 | 11.0 | 0.7  | 45.6 | 12.5 |
| Chroococcales       | 1.2                | 52.3 | 10.2            | 0.7                | 43.7 | 13.5            | 0.6                | 50.3 | 12.7            | 0.3                | 51.8 | 9.1             | 0.3  | 44.1 | 11.0 | 0.2  | 48.7 | 11.4 |
| Prochlorales        | 6.0                | 34.6 | 5.5             | 18.7               | 32.2 | 4.6             | 28.6               | 32.0 | 5.9             | 0.1                | 47.8 | 8.5             | 0.4  | 33.4 | 8.3  | 0.2  | 36.2 | 10.2 |
| Firmicutes          | 1.7                | 46.1 | 8.9             | 1.5                | 37.4 | 10.0            | 0.6                | 39.7 | 11.1            | 2.6                | 51.2 | 8.9             | 2.5  | 44.5 | 10.4 | 1.3  | 48.0 | 11.5 |
| Proteobacteria      | 30.4               | 47.7 | 10.0            | 45.8               | 35.1 | 9.7             | 37.8               | 35.1 | 9.1             | 27.2               | 49.8 | 9.4             | 39.0 | 40.7 | 11.0 | 39.3 | 42.1 | 11.7 |
| Alphaproteobacteria | 9.4                | 45.7 | 9.9             | 30.9               | 32.3 | 7.4             | 26.6               | 33.0 | 7.9             | 6.7                | 51.0 | 9.5             | 17.9 | 36.5 | 11.1 | 18.2 | 38.2 | 12.1 |
| Rhizobiales         | 2.2                | 47.9 | 10.2            | 3.0                | 37.0 | 10.2            | 1.0                | 40.3 | 11.1            | 2.0                | 51.9 | 8.2             | 2.2  | 45.9 | 11.3 | 1.6  | 49.4 | 11.5 |
| Rhodobacterales     | 2.2                | 44.5 | 8.4             | 3.1                | 36.9 | 7.7             | 1.6                | 40.1 | 8.5             | 1.1                | 51.2 | 8.9             | 1.7  | 44.0 | 10.4 | 1.7  | 47.2 | 10.7 |
| Rickettsiales       | 0.7                | 32.4 | 5.9             | 19.3               | 29.5 | 4.1             | 17.0               | 30.3 | 5.5             | 0.4                | 36.2 | 7.2             | 9.9  | 30.0 | 4.5  | 8.6  | 30.7 | 6.0  |
| SAR11 cluster       | 0.7                | 32.3 | 5.2             | 19.1               | 29.5 | 4.1             | 16.8               | 30.3 | 5.4             | 0.4                | 35.9 | 7.2             | 9.8  | 30.0 | 4.4  | 8.4  | 30.7 | 5.9  |
| Betaproteobacteria  | 2.3                | 54.9 | 11.4            | 2.3                | 46.5 | 12.0            | 0.6                | 44.1 | 11.4            | 1.8                | 53.9 | 8.6             | 2.1  | 48.1 | 10.0 | 1.2  | 50.0 | 10.9 |
| Burkholderiales     | 1.9                | 56.1 | 11.3            | 2.0                | 48.1 | 11.8            | 0.4                | 45.7 | 11.3            | 1.3                | 55.0 | 8.1             | 1.6  | 49.3 | 9.9  | 0.8  | 51.6 | 11.0 |
| Gammaproteobacteria | 8.4                | 45.5 | 8.2             | 6.1                | 40.3 | 9.8             | 2.8                | 42.0 | 9.8             | 7.1                | 46.1 | 8.6             | 8.4  | 42.3 | 8.3  | 6.9  | 44.3 | 9.0  |
| Alteromonadales     | 1.0                | 44.5 | 7.5             | 0.7                | 39.1 | 9.4             | 0.3                | 39.9 | 10.3            | 1.1                | 46.8 | 8.8             | 1.1  | 43.3 | 7.7  | 1.4  | 45.6 | 7.0  |
| Enterobacteriales   | 0.2                | 49.4 | 7.2             | 0.2                | 37.5 | 9.8             | 0.1                | 37.7 | 9.4             | 0.2                | 49.9 | 7.7             | 0.2  | 40.9 | 10.0 | 0.1  | 45.4 | 12.3 |
| Deltaproteobacteria | 3.8                | 52.3 | 10.0            | 1.5                | 46.2 | 12.2            | 0.5                | 45.4 | 11.1            | 4.6                | 51.5 | 9.8             | 3.4  | 45.8 | 9.9  | 1.5  | 48.3 | 10.9 |
| Archaea             | 5.2                | 47.4 | 6.1             | 1.4                | 40.8 | 9.2             | 0.8                | 40.3 | 9.3             | 7.5                | 46.2 | 11.3            | 14.5 | 37.0 | 6.5  | 14.6 | 37.3 | 6.4  |
| Euryarchaeota       | 4.2                | 48.0 | 5.3             | 0.9                | 43.1 | 9.0             | 0.4                | 44.5 | 9.6             | 3.5                | 55.1 | 7.3             | 1.6  | 47.0 | 11.2 | 0.7  | 49.0 | 11.4 |
| Thaumarchaeota      | 0.3                | 37.1 | 8.8             | 0.4                | 33.5 | 4.3             | 0.3                | 34.8 | 5.0             | 3.4                | 35.9 | 3.8             | 12.6 | 35.5 | 3.5  | 13.0 | 36.5 | 5.0  |
| Eukaryota           | 5.4                | 54.4 | 9.0             | 2.8                | 45.4 | 12.7            | 0.5                | 51.1 | 11.9            | 1.3                | 53.7 | 9.3             | 1.5  | 40.9 | 12.2 | 0.3  | 45.6 | 10.8 |
| Fungi               | 1.9                | 55.8 | 8.7             | 0.8                | 48.4 | 12.2            | 0.2                | 49.1 | 12.3            | 0.5                | 55.5 | 8.0             | 0.4  | 44.4 | 11.4 | 0.1  | 46.4 | 10.2 |
| Viruses             | 1.1                | 41.2 | 10.3            | 1.2                | 36.8 | 8.1             | 1.1                | 36.4 | 6.1             | 0.4                | 52.1 | 10.8            | 0.9  | 36.7 | 8.5  | 0.4  | 36.3 | 6.9  |
| Caudovirales        | 0.8                | 36.5 | 4.7             | 1.0                | 35.8 | 4.2             | 1.1                | 36.3 | 5.7             | 0.2                | 50.0 | 12.3            | 0.6  | 36.8 | 5.9  | 0.4  | 36.3 | 6.9  |

<sup>a</sup>Percentage of reads assigned to a taxon

<sup>b</sup>Standard deviation of the GC content for each taxon (weighted by read length)



**Supplementary Table 7** Prevalence and GC content of taxonomic groups in HOT 186 sequencing libraries at 25–75 m using blastn

| Taxa                | 25m                |      |                 |                    |      |                 | 75m                |      |                 |                    |      |                 |      |      |      |      |      |      |
|---------------------|--------------------|------|-----------------|--------------------|------|-----------------|--------------------|------|-----------------|--------------------|------|-----------------|------|------|------|------|------|------|
|                     | Fosmid Ends        |      |                 | Shotgun            |      |                 | Fosmid Ends        |      |                 | Shotgun            |      |                 |      |      |      |      |      |      |
|                     | % Rd. <sup>a</sup> | % GC | SD <sup>b</sup> | % Rd. <sup>a</sup> | % GC | SD <sup>b</sup> | % Rd. <sup>a</sup> | % GC | SD <sup>b</sup> | % Rd. <sup>a</sup> | % GC | SD <sup>b</sup> |      |      |      |      |      |      |
| Bacteria            | 98.5               | 49.7 | 9.2             | 96.1               | 33.7 | 7.1             | 96.3               | 33.7 | 8.0             | 95.3               | 49.9 | 9.6             | 91.2 | 38.1 | 7.8  | 95.2 | 32.9 | 6.9  |
| Actinobacteria      | 1.5                | 58.8 | 5.6             | 0.4                | 56.1 | 10.9            | 0.4                | 61.1 | 9.7             | 2.8                | 61.1 | 6.6             | 0.1  | 56.0 | 7.7  | 0.2  | 58.6 | 11.2 |
| Bacteroidetes       | 3.0                | 42.1 | 9.1             | 4.8                | 33.2 | 5.1             | 3.0                | 34.2 | 6.1             | 3.0                | 42.3 | 7.3             | 2.4  | 34.8 | 4.6  | 2.5  | 33.5 | 5.6  |
| Flavobacteria       | 2.2                | 39.6 | 7.7             | 4.3                | 32.9 | 4.6             | 2.6                | 33.8 | 5.6             | 1.6                | 39.4 | 7.1             | 2.1  | 34.5 | 4.1  | 2.2  | 33.2 | 5.2  |
| Cyanobacteria       | 11.3               | 47.7 | 13.9            | 40.9               | 32.2 | 4.3             | 52.0               | 31.8 | 5.7             | 17.2               | 48.9 | 13.6            | 38.1 | 34.2 | 4.7  | 58.8 | 31.9 | 5.7  |
| Chroococcales       | 6.6                | 58.9 | 6.3             | 0.4                | 43.0 | 13.1            | 0.6                | 49.8 | 13.3            | 10.9               | 58.1 | 6.8             | 0.6  | 53.4 | 9.2  | 0.4  | 50.1 | 13.3 |
| Prochlorales        | 4.4                | 33.2 | 5.4             | 40.1               | 32.0 | 4.0             | 51.0               | 31.5 | 5.3             | 6.1                | 32.8 | 5.3             | 37.4 | 33.9 | 3.9  | 58.1 | 31.7 | 5.3  |
| Firmicutes          | 1.6                | 42.9 | 8.4             | 2.3                | 32.9 | 5.5             | 1.9                | 34.0 | 7.0             | 1.5                | 43.7 | 8.1             | 3.0  | 46.3 | 7.6  | 1.8  | 33.7 | 6.9  |
| Proteobacteria      | 69.0               | 50.3 | 8.3             | 39.4               | 34.8 | 8.5             | 33.3               | 35.7 | 9.6             | 59.9               | 50.5 | 8.3             | 12.9 | 40.6 | 8.4  | 27.0 | 34.3 | 8.3  |
| Alphaproteobacteria | 25.6               | 52.8 | 9.6             | 28.9               | 32.6 | 7.2             | 23.6               | 33.3 | 8.6             | 19.9               | 52.8 | 9.5             | 6.3  | 36.7 | 8.1  | 20.3 | 32.1 | 6.8  |
| Rhizobiales         | 3.1                | 54.3 | 7.8             | 0.6                | 45.6 | 13.0            | 0.6                | 48.2 | 13.2            | 2.8                | 55.4 | 8.5             | 0.3  | 44.7 | 10.0 | 0.4  | 43.7 | 12.1 |
| Rhodobacterales     | 10.9               | 54.8 | 8.1             | 1.1                | 47.2 | 10.2            | 1.1                | 51.6 | 10.7            | 9.2                | 53.6 | 8.3             | 0.8  | 46.6 | 7.9  | 0.5  | 46.8 | 10.4 |
| Rickettsiales       | 2.3                | 33.6 | 5.2             | 25.8               | 30.8 | 3.9             | 20.8               | 31.1 | 4.9             | 1.5                | 34.1 | 6.2             | 4.7  | 33.2 | 4.0  | 18.9 | 31.1 | 5.1  |
| SAR11 cluster       | 2.1                | 33.5 | 5.2             | 25.2               | 30.8 | 3.9             | 20.2               | 31.0 | 4.9             | 1.2                | 33.2 | 5.8             | 4.4  | 33.1 | 4.0  | 18.4 | 31.0 | 5.0  |
| Betaproteobacteria  | 2.2                | 54.7 | 6.3             | 0.4                | 47.2 | 12.4            | 0.4                | 48.8 | 13.4            | 1.9                | 54.8 | 7.7             | 0.2  | 45.6 | 8.6  | 0.3  | 44.9 | 11.7 |
| Burkholderiales     | 1.5                | 55.8 | 5.6             | 0.2                | 52.8 | 12.0            | 0.2                | 54.4 | 12.2            | 1.4                | 55.0 | 8.1             | 0.1  | 47.7 | 7.8  | 0.1  | 49.2 | 11.7 |
| Gammaproteobacteria | 34.6               | 47.7 | 6.5             | 7.8                | 41.1 | 7.9             | 7.2                | 42.0 | 8.0             | 31.7               | 48.1 | 6.7             | 5.4  | 44.6 | 6.2  | 4.8  | 41.5 | 7.9  |
| Alteromonadales     | 20.7               | 45.4 | 4.9             | 3.4                | 42.5 | 5.4             | 3.6                | 43.3 | 5.9             | 18.7               | 45.6 | 5.0             | 2.7  | 45.0 | 4.2  | 2.3  | 43.4 | 6.2  |
| Enterobacteriales   | 1.5                | 50.9 | 7.4             | 0.7                | 35.7 | 7.4             | 0.7                | 38.6 | 9.8             | 2.0                | 51.7 | 7.7             | 0.9  | 45.7 | 7.2  | 0.5  | 36.8 | 9.0  |
| Deltaproteobacteria | 0.8                | 54.7 | 6.7             | 0.2                | 48.4 | 12.5            | 0.2                | 49.8 | 13.9            | 1.4                | 55.7 | 7.8             | 0.1  | 48.8 | 9.2  | 0.2  | 47.4 | 13.3 |
| Archaea             | 0.1                | 49.8 | 9.9             | 0.4                | 35.1 | 8.6             | 0.3                | 36.1 | 10.6            | 0.4                | 45.6 | 7.0             | 0.1  | 37.6 | 8.0  | 0.3  | 35.6 | 10.2 |
| Euryarchaeota       | 0.1                | 49.4 | 10.6            | 0.3                | 35.3 | 9.1             | 0.3                | 36.2 | 11.1            | 0.4                | 45.8 | 7.6             | 0.1  | 37.6 | 8.2  | 0.3  | 35.6 | 10.5 |
| Thaumarchaeota      | —                  | —    | —               | 0.0                | 37.4 | 0.7             | 0.0                | 34.4 | 5.2             | —                  | —    | —               | 0.0  | 35.0 | 2.4  | 0.0  | 31.4 | 6.7  |
| Eukaryota           | 0.3                | 43.2 | 10.2            | 1.3                | 31.6 | 8.7             | 1.1                | 31.9 | 11.2            | 0.5                | 45.1 | 10.9            | 2.4  | 48.7 | 6.2  | 1.0  | 30.2 | 10.0 |
| Fungi               | 0.2                | 45.5 | 10.2            | 0.3                | 36.6 | 8.9             | 0.3                | 39.9 | 12.6            | 0.3                | 49.3 | 8.1             | 0.1  | 39.2 | 9.4  | 0.2  | 37.1 | 11.5 |
| Viruses             | 0.3                | 39.5 | 4.1             | 1.0                | 35.2 | 4.3             | 1.4                | 36.1 | 4.8             | 2.7                | 40.2 | 4.8             | 1.3  | 39.2 | 3.5  | 2.7  | 37.0 | 4.8  |
| Caudovirales        | 0.3                | 39.4 | 4.0             | 0.9                | 35.4 | 3.5             | 1.4                | 36.2 | 4.4             | 2.6                | 40.1 | 4.4             | 1.3  | 39.2 | 3.4  | 2.6  | 37.1 | 4.7  |

<sup>a</sup>Percentage of reads assigned to a taxon<sup>b</sup>Standard deviation of the GC content for each taxon (weighted by read length)

**Supplementary Table 8** Prevalence and GC content of taxonomic groups in HOT 186 sequencing libraries at 110–500 m using blastn

| Taxa                 | Depth:             |      |                 |                    |      |                 |      |      |      |      |      |      |
|----------------------|--------------------|------|-----------------|--------------------|------|-----------------|------|------|------|------|------|------|
|                      | 110 m              |      |                 | 500 m              |      |                 |      |      |      |      |      |      |
|                      | Fosmid Ends        |      | 454             | Fosmid Ends        |      | 454             |      |      |      |      |      |      |
|                      | % Rd. <sup>a</sup> | % GC | SD <sup>b</sup> | % Rd. <sup>a</sup> | % GC | SD <sup>b</sup> |      |      |      |      |      |      |
| Bacteria             | 96.0               | 39.9 | 9.0             | 91.1               | 34.2 | 7.6             | 90.8 | 49.9 | 9.5  | 82.5 | 41.6 | 13.0 |
| Actinobacteria       | 1.2                | 58.0 | 7.8             | 0.5                | 58.2 | 10.9            | 7.1  | 59.9 | 6.9  | 4.5  | 64.4 | 6.4  |
| Bacteroidetes        | 1.2                | 45.4 | 8.3             | 3.1                | 33.6 | 6.1             | 3.5  | 43.9 | 8.2  | 2.9  | 38.1 | 8.8  |
| Flavobacteria        | 0.4                | 38.1 | 6.6             | 2.6                | 33.1 | 5.3             | 1.9  | 41.5 | 7.4  | 2.0  | 36.0 | 7.0  |
| Cyanobacteria        | 69.3               | 36.2 | 5.3             | 42.4               | 34.1 | 5.8             | 3.2  | 41.7 | 9.6  | 6.9  | 35.0 | 7.8  |
| Chroococcales        | 1.6                | 54.6 | 7.7             | 0.4                | 41.0 | 11.5            | 0.8  | 50.8 | 9.1  | 0.5  | 45.5 | 12.2 |
| Prochlorales         | 67.3               | 35.7 | 4.4             | 41.6               | 34.0 | 5.7             | 1.8  | 35.9 | 5.4  | 6.0  | 33.6 | 5.9  |
| Firmicutes           | 1.0                | 43.2 | 8.6             | 2.8                | 33.9 | 7.3             | 5.2  | 44.7 | 8.1  | 4.1  | 38.9 | 9.7  |
| Proteobacteria       | 13.9               | 49.6 | 9.3             | 34.6               | 33.4 | 8.3             | 46.2 | 49.5 | 9.1  | 49.8 | 39.5 | 11.9 |
| Alphaproteobacteria  | 6.0                | 48.8 | 9.7             | 28.3               | 32.0 | 6.9             | 15.3 | 49.2 | 10.6 | 32.9 | 35.9 | 10.6 |
| Rhizobiales          | 1.1                | 52.0 | 8.4             | 0.6                | 45.2 | 12.6            | 4.0  | 54.2 | 7.5  | 2.0  | 53.3 | 11.6 |
| Rhodobacterales      | 2.2                | 50.5 | 8.2             | 0.5                | 47.3 | 10.3            | 3.1  | 52.7 | 6.5  | 1.6  | 52.8 | 9.6  |
| Rickettsiales        | 0.9                | 36.4 | 6.7             | 26.4               | 30.9 | 5.1             | 3.8  | 34.6 | 5.4  | 26.8 | 32.0 | 5.2  |
| SAR11 cluster        | 0.6                | 34.8 | 5.8             | 25.6               | 30.9 | 5.1             | 3.5  | 33.9 | 4.4  | 25.8 | 31.9 | 5.1  |
| Betaproteobacteria   | 1.0                | 55.8 | 6.6             | 0.4                | 49.5 | 13.0            | 3.5  | 54.9 | 6.7  | 1.9  | 54.6 | 10.2 |
| Burkholderiales      | 0.6                | 57.2 | 5.8             | 0.3                | 54.4 | 11.7            | 2.3  | 56.2 | 6.1  | 1.2  | 56.8 | 9.1  |
| Gammaaproteobacteria | 3.9                | 47.0 | 7.8             | 3.7                | 38.9 | 9.0             | 15.9 | 46.8 | 7.5  | 9.0  | 43.3 | 9.3  |
| Alteromonadales      | 0.6                | 44.9 | 7.3             | 0.7                | 39.1 | 8.2             | 2.4  | 46.5 | 6.5  | 1.4  | 42.2 | 8.3  |
| Enterobacteriales    | 0.4                | 49.4 | 8.0             | 0.6                | 35.9 | 9.0             | 1.7  | 47.8 | 6.7  | 1.1  | 41.4 | 10.4 |
| Deltaproteobacteria  | 1.0                | 58.0 | 7.2             | 0.3                | 51.3 | 12.7            | 3.9  | 54.8 | 8.2  | 1.4  | 54.9 | 10.7 |
| Archaea              | 0.3                | 48.2 | 11.8            | 0.6                | 38.3 | 11.0            | 4.8  | 41.7 | 9.2  | 13.3 | 37.5 | 5.8  |
| Euryarchaeota        | 0.3                | 48.0 | 11.4            | 0.5                | 38.9 | 11.3            | 1.5  | 52.4 | 7.7  | 1.1  | 44.3 | 12.4 |
| Thaumarchaeota       | 0.0                | 36.3 | 0.0             | 0.0                | 34.8 | 5.9             | 3.1  | 36.5 | 3.5  | 11.9 | 36.9 | 4.2  |
| Eukaryota            | 0.6                | 45.9 | 12.1            | 1.9                | 34.0 | 12.4            | 1.2  | 44.1 | 10.6 | 1.7  | 32.5 | 11.4 |
| Fungi                | 0.3                | 47.2 | 11.4            | 0.5                | 41.9 | 12.4            | 0.6  | 48.8 | 8.4  | 0.4  | 40.9 | 12.0 |
| Viruses              | 2.3                | 40.9 | 4.0             | 5.1                | 36.3 | 4.8             | 0.3  | 41.1 | 8.0  | 0.6  | 36.9 | 5.7  |
| Caudovirales         | 2.3                | 40.9 | 4.0             | 5.1                | 36.3 | 4.5             | 0.3  | 39.2 | 6.8  | 0.6  | 37.1 | 4.8  |

<sup>a</sup>Percentage of reads assigned to a taxon

<sup>b</sup>Standard deviation of the GC content for each taxon (weighted by read length)

**Supplementary Table 9** Prevalence and GC content of taxonomic groups in HOT 186 sequencing libraries at 25–75 m using blastx

| Taxa                | 25m                |      |                 |                    |      |                 | 75m                |      |                 |                    |      |                 |      |      |      |      |      |      |
|---------------------|--------------------|------|-----------------|--------------------|------|-----------------|--------------------|------|-----------------|--------------------|------|-----------------|------|------|------|------|------|------|
|                     | Fosmid Ends        |      |                 | Shotgun            |      |                 | Fosmid Ends        |      |                 | Shotgun            |      |                 |      |      |      |      |      |      |
|                     | % Rd. <sup>a</sup> | % GC | SD <sup>b</sup> | % Rd. <sup>a</sup> | % GC | SD <sup>b</sup> | % Rd. <sup>a</sup> | % GC | SD <sup>b</sup> | % Rd. <sup>a</sup> | % GC | SD <sup>b</sup> |      |      |      |      |      |      |
| Bacteria            | 96.8               | 49.0 | 8.5             | 94.0               | 34.3 | 7.7             | 93.2               | 34.6 | 8.5             | 95.2               | 48.8 | 9.0             | 94.2 | 39.0 | 8.2  | 91.6 | 34.1 | 7.8  |
| Actinobacteria      | 1.3                | 53.1 | 10.2            | 1.4                | 41.9 | 11.6            | 0.9                | 44.6 | 13.5            | 2.2                | 58.6 | 9.6             | 1.2  | 47.3 | 9.1  | 0.9  | 43.7 | 11.2 |
| Bacteroidetes       | 4.9                | 46.6 | 10.3            | 6.8                | 33.4 | 6.8             | 4.8                | 33.6 | 7.3             | 3.4                | 44.6 | 10.7            | 5.4  | 34.8 | 5.6  | 4.0  | 32.3 | 5.9  |
| Flavobacteria       | 2.3                | 43.7 | 10.5            | 4.1                | 32.4 | 5.6             | 2.6                | 32.5 | 6.2             | 1.5                | 39.8 | 10.1            | 3.7  | 34.0 | 4.6  | 2.1  | 31.7 | 5.3  |
| Cyanobacteria       | 5.6                | 47.3 | 13.6            | 28.3               | 32.1 | 4.4             | 30.3               | 31.9 | 5.6             | 8.3                | 48.9 | 13.3            | 35.6 | 34.5 | 5.1  | 36.3 | 32.0 | 5.5  |
| Chroococcales       | 3.1                | 57.5 | 8.0             | 0.6                | 37.5 | 11.4            | 0.5                | 42.6 | 13.7            | 4.7                | 57.5 | 7.2             | 1.0  | 45.9 | 11.4 | 0.4  | 42.1 | 13.3 |
| Prochlorales        | 2.0                | 33.5 | 5.9             | 26.3               | 31.8 | 3.8             | 26.8               | 31.1 | 4.8             | 2.5                | 32.3 | 5.0             | 33.6 | 34.0 | 4.1  | 31.9 | 31.3 | 4.9  |
| Firmicutes          | 0.8                | 48.1 | 8.0             | 1.3                | 37.9 | 10.1            | 0.7                | 37.9 | 10.2            | 0.7                | 47.9 | 8.2             | 0.8  | 42.1 | 8.5  | 0.7  | 37.7 | 9.8  |
| Proteobacteria      | 60.4               | 48.9 | 8.2             | 45.4               | 34.8 | 8.2             | 41.7               | 35.5 | 9.1             | 56.5               | 48.3 | 8.4             | 38.6 | 42.0 | 8.4  | 35.2 | 34.9 | 8.5  |
| Alphaproteobacteria | 18.7               | 48.4 | 9.8             | 28.4               | 32.4 | 6.6             | 23.3               | 32.8 | 8.1             | 18.2               | 47.2 | 9.6             | 15.4 | 37.6 | 7.2  | 20.7 | 32.1 | 7.1  |
| Rhizobiales         | 2.7                | 49.0 | 9.1             | 2.1                | 36.1 | 8.8             | 1.1                | 37.5 | 10.2            | 2.9                | 47.9 | 9.1             | 2.2  | 39.1 | 7.9  | 1.0  | 36.8 | 8.8  |
| Rhodobacterales     | 9.2                | 49.0 | 9.6             | 3.5                | 38.2 | 7.9             | 2.6                | 40.7 | 9.5             | 9.0                | 47.1 | 9.3             | 5.1  | 39.7 | 6.2  | 1.9  | 38.7 | 7.8  |
| Rickettsiales       | 1.0                | 32.6 | 5.4             | 18.5               | 30.1 | 3.8             | 13.8               | 29.5 | 4.7             | 0.5                | 31.9 | 6.3             | 4.2  | 32.6 | 4.3  | 12.8 | 29.4 | 4.9  |
| SAR11 cluster       | 1.0                | 32.3 | 5.1             | 18.3               | 30.1 | 3.8             | 13.6               | 29.5 | 4.7             | 0.5                | 31.8 | 6.1             | 4.1  | 32.7 | 4.2  | 12.7 | 29.4 | 4.9  |
| Betaproteobacteria  | 1.3                | 49.3 | 8.7             | 1.0                | 41.8 | 13.0            | 0.6                | 40.5 | 10.8            | 1.6                | 47.4 | 9.0             | 1.1  | 42.7 | 8.3  | 0.5  | 39.9 | 9.6  |
| Burkholderiales     | 1.0                | 50.3 | 8.3             | 0.7                | 44.9 | 13.6            | 0.4                | 42.4 | 11.1            | 1.1                | 48.8 | 9.0             | 0.8  | 44.1 | 8.5  | 0.3  | 41.3 | 10.1 |
| Gammaproteobacteria | 29.0               | 48.8 | 7.0             | 10.7               | 39.1 | 8.0             | 9.1                | 40.5 | 8.4             | 25.7               | 48.6 | 7.1             | 15.9 | 46.1 | 7.3  | 6.5  | 40.5 | 8.2  |
| Alteromonadales     | 11.4               | 45.0 | 4.7             | 3.1                | 41.3 | 6.1             | 2.8                | 43.1 | 6.0             | 10.3               | 45.3 | 5.1             | 3.5  | 44.2 | 5.0  | 1.8  | 43.4 | 6.3  |
| Enterobacteriales   | 0.4                | 49.4 | 8.6             | 0.2                | 35.6 | 9.1             | 0.2                | 39.8 | 11.0            | 0.6                | 52.3 | 7.5             | 5.7  | 51.4 | 3.9  | 0.1  | 36.4 | 9.2  |
| Deltaproteobacteria | 2.0                | 53.4 | 7.0             | 1.1                | 43.5 | 12.6            | 0.6                | 44.0 | 12.1            | 2.4                | 52.7 | 8.4             | 1.2  | 46.8 | 9.3  | 0.7  | 42.7 | 11.0 |
| Archaea             | 0.2                | 45.8 | 8.7             | 0.6                | 40.2 | 9.4             | 0.6                | 42.3 | 9.2             | 0.3                | 48.1 | 8.0             | 0.4  | 43.1 | 7.6  | 0.6  | 40.9 | 8.5  |
| Euryarchaeota       | 0.1                | 46.0 | 8.1             | 0.5                | 40.6 | 8.8             | 0.5                | 42.4 | 9.2             | 0.2                | 48.2 | 8.4             | 0.3  | 43.5 | 7.5  | 0.5  | 41.0 | 8.4  |
| Thaumarchaeota      | 0.0                | 43.2 | 0.0             | 0.0                | 33.8 | 10.8            | 0.0                | 36.6 | 9.4             | 0.0                | 43.3 | 10.1            | 0.0  | 39.8 | 8.0  | 0.0  | 35.6 | 7.2  |
| Eukaryota           | 0.5                | 52.5 | 8.3             | 1.0                | 41.0 | 13.7            | 0.6                | 45.8 | 13.9            | 0.6                | 49.9 | 11.0            | 0.8  | 42.4 | 11.1 | 0.4  | 42.6 | 14.1 |
| Fungi               | 0.2                | 50.2 | 8.5             | 0.3                | 44.2 | 11.7            | 0.2                | 47.0 | 14.4            | 0.2                | 51.5 | 10.0            | 0.3  | 44.5 | 10.4 | 0.1  | 44.0 | 14.2 |
| Viruses             | 0.3                | 46.8 | 10.5            | 1.8                | 35.1 | 5.2             | 2.7                | 35.3 | 5.1             | 0.7                | 41.6 | 9.6             | 2.4  | 37.6 | 4.4  | 4.4  | 35.6 | 4.8  |
| Caudovirales        | 0.2                | 41.7 | 9.0             | 1.6                | 35.1 | 3.4             | 2.6                | 35.3 | 4.5             | 0.5                | 38.6 | 5.1             | 2.2  | 37.5 | 3.3  | 4.3  | 35.6 | 4.4  |

<sup>a</sup>Percentage of reads assigned to a taxon

<sup>b</sup>Standard deviation of the GC content for each taxon (weighted by read length)

**Supplementary Table 10** Prevalence and GC content of taxonomic groups in HOT 186 sequencing libraries at 110–500 m using blastx

| Taxa                 | Depth:             |      |                 |                    |      |                 |      |      |      |      |      |      |
|----------------------|--------------------|------|-----------------|--------------------|------|-----------------|------|------|------|------|------|------|
|                      | 110 m              |      |                 | 500 m              |      |                 |      |      |      |      |      |      |
|                      | Fosmid Ends        |      | 454             | Fosmid Ends        |      | 454             |      |      |      |      |      |      |
| Library:             | % Rd. <sup>a</sup> | % GC | SD <sup>b</sup> | % Rd. <sup>a</sup> | % GC | SD <sup>b</sup> |      |      |      |      |      |      |
| Bacteria             | 93.9               | 43.4 | 9.7             | 87.3               | 35.3 | 8.6             | 87.9 | 49.4 | 8.6  | 79.5 | 43.5 | 12.2 |
| Actinobacteria       | 1.0                | 54.3 | 9.2             | 1.8                | 43.3 | 10.5            | 4.6  | 55.8 | 8.7  | 3.1  | 60.4 | 10.7 |
| Bacteroidetes        | 1.4                | 47.0 | 9.7             | 3.9                | 32.7 | 6.7             | 3.8  | 45.5 | 8.8  | 2.7  | 39.6 | 9.6  |
| Flavobacteria        | 0.4                | 43.5 | 10.8            | 1.8                | 31.4 | 5.5             | 0.8  | 43.3 | 9.4  | 0.8  | 36.6 | 9.2  |
| Cyanobacteria        | 39.2               | 36.3 | 5.5             | 22.3               | 34.1 | 5.6             | 1.7  | 45.4 | 9.7  | 2.5  | 36.6 | 9.0  |
| Chroococcales        | 1.4                | 47.4 | 10.3            | 0.3                | 39.2 | 10.2            | 0.3  | 48.8 | 8.6  | 0.2  | 45.0 | 11.7 |
| Prochlorales         | 33.1               | 35.4 | 4.2             | 18.4               | 33.3 | 5.2             | 0.6  | 37.7 | 7.7  | 1.7  | 33.1 | 5.9  |
| Firmicutes           | 0.7                | 51.0 | 8.2             | 1.3                | 37.9 | 10.3            | 2.6  | 49.3 | 8.6  | 1.5  | 44.5 | 10.9 |
| Proteobacteria       | 24.8               | 45.8 | 8.4             | 37.0               | 34.0 | 8.5             | 33.9 | 47.9 | 8.4  | 39.1 | 40.0 | 11.1 |
| Alphaproteobacteria  | 10.7               | 43.5 | 7.7             | 23.4               | 31.5 | 6.9             | 8.6  | 47.9 | 9.4  | 19.1 | 35.9 | 10.7 |
| Rhizobiales          | 1.9                | 46.1 | 8.2             | 1.1                | 37.0 | 9.5             | 2.5  | 51.2 | 7.9  | 1.5  | 45.6 | 11.6 |
| Rhodobacterales      | 4.0                | 42.4 | 7.8             | 1.5                | 37.6 | 7.8             | 1.5  | 48.7 | 8.6  | 1.4  | 44.6 | 10.6 |
| Rickettsiales        | 0.3                | 31.4 | 6.1             | 15.1               | 29.1 | 4.8             | 0.9  | 33.0 | 5.2  | 10.0 | 30.1 | 5.0  |
| SAR11 cluster        | 0.3                | 31.2 | 6.2             | 14.9               | 29.1 | 4.8             | 0.9  | 32.9 | 5.1  | 9.8  | 30.1 | 5.0  |
| Betaproteobacteria   | 1.8                | 43.5 | 9.3             | 0.6                | 41.9 | 10.5            | 2.0  | 51.0 | 7.5  | 1.1  | 47.9 | 10.4 |
| Burkholderiales      | 1.5                | 42.9 | 9.9             | 0.4                | 43.2 | 10.7            | 1.5  | 51.5 | 7.4  | 0.8  | 49.1 | 10.3 |
| Gammaaproteobacteria | 4.7                | 47.0 | 7.2             | 4.5                | 38.5 | 8.2             | 10.6 | 46.0 | 7.6  | 6.5  | 42.7 | 8.9  |
| Alteromonadales      | 0.6                | 47.1 | 8.0             | 0.4                | 38.1 | 8.3             | 1.2  | 45.3 | 7.8  | 0.6  | 43.3 | 9.6  |
| Enterobacteriales    | 0.1                | 47.1 | 9.0             | 0.1                | 36.4 | 10.2            | 0.2  | 49.7 | 7.1  | 0.2  | 43.3 | 11.1 |
| Deltaproteobacteria  | 2.8                | 53.1 | 8.3             | 1.1                | 44.2 | 11.6            | 3.9  | 50.3 | 8.5  | 1.9  | 46.8 | 10.5 |
| Archaea              | 0.3                | 48.6 | 9.5             | 1.1                | 41.7 | 8.6             | 4.1  | 44.8 | 10.1 | 13.2 | 37.4 | 6.9  |
| Euryarchaeota        | 0.3                | 47.5 | 9.7             | 0.9                | 41.7 | 8.4             | 1.9  | 51.6 | 8.0  | 1.3  | 48.3 | 11.1 |
| Thaumarchaeota       | 0.0                | 51.7 | 0.0             | 0.0                | 36.3 | 10.5            | 1.8  | 36.4 | 4.3  | 11.3 | 35.9 | 4.2  |
| Eukaryota            | 1.2                | 53.1 | 9.2             | 1.2                | 45.7 | 13.5            | 0.7  | 50.6 | 9.0  | 0.4  | 43.8 | 12.1 |
| Fungi                | 0.5                | 52.5 | 9.5             | 0.4                | 46.9 | 14.0            | 0.2  | 52.0 | 8.6  | 0.1  | 46.5 | 13.3 |
| Viruses              | 0.9                | 41.1 | 8.5             | 5.7                | 35.8 | 5.1             | 0.2  | 45.7 | 10.6 | 0.8  | 36.8 | 6.7  |
| Caudovirales         | 0.8                | 39.1 | 5.5             | 5.5                | 35.6 | 4.4             | 0.2  | 42.1 | 9.3  | 0.8  | 36.4 | 5.2  |

<sup>a</sup>Percentage of reads assigned to a taxon

<sup>b</sup>Standard deviation of the GC content for each taxon (weighted by read length)

**Supplementary Table 11** KEGG orthologs biased against Fosmid Ends

| <i>K-Number</i> | <i>Function</i>                                                                          | <i>Consensus Taxon</i> <sup>a</sup> | <i>Bias</i> <sub>Fosmid Ends/Shotgun</sub> <sup>b</sup> | <i>Bias</i> <sub>Fosmid Ends/454</sub> <sup>b</sup> |
|-----------------|------------------------------------------------------------------------------------------|-------------------------------------|---------------------------------------------------------|-----------------------------------------------------|
| K11532          | fructose-1,6-bisphosphatase II / sedoheptulose-1,7-bisphosphatase [EC:3.1.3.11 3.1.3.37] | <i>Prochlorococcus marinus</i>      | $-\infty$                                               | $-\infty$                                           |
| K08262          | delta12-fatty acid dehydrogenase [EC:1.14.99.33]                                         | <i>Prochlorococcus marinus</i>      | -4.2                                                    | -4.7                                                |
| K05575          | NADH dehydrogenase I subunit 4 [EC:1.6.5.3]                                              | <i>Prochlorococcus marinus</i>      | -3.7                                                    | -4.5                                                |
| K07444          | putative N6-adenine-specific DNA methylase [EC:2.1.1.-]                                  | <i>Prochlorococcus marinus</i>      | -3.4                                                    | -3.7                                                |
| K01971          | DNA ligase (ATP) [EC:6.5.1.1]                                                            | <i>Prochlorococcus marinus</i>      | -2.9                                                    | -3.7                                                |
| K04040          | chlorophyll synthase [EC:2.5.1.62]                                                       | <i>Prochlorococcus marinus</i>      | -3.1                                                    | -3.5                                                |
| K00524          | ribonucleotide reductase, class II [EC:1.17.4.1]                                         | <i>Prochlorococcus marinus</i>      | -2.7                                                    | -3.2                                                |
| K03403          | magnesium chelatase subunit H [EC:6.6.1.1]                                               | <i>Prochlorococcus marinus</i>      | -2.2                                                    | -3.0                                                |
| K06876          |                                                                                          | Bacteria                            | -2.4                                                    | -2.6                                                |
| K07042          | probable rRNA maturation factor                                                          | Bacteria                            | -1.8                                                    | -1.6                                                |
| K03798          | cell division protease FtsH [EC:3.4.24.-]                                                | <i>Prochlorococcus marinus</i>      | -1.3                                                    | -2.0                                                |
| K02551          | 2-succinyl-5-enolpyruvyl-6-hydroxy-3-cyclohexene-1-carboxylate synthase [EC:2.2.1.9]     | <i>Prochlorococcus marinus</i>      | -1.1                                                    | -1.7                                                |
| K01810          | glucose-6-phosphate isomerase [EC:5.3.1.9]                                               | Bacteria                            | -1.3                                                    | -1.4                                                |
| K02316          | DNA primase [EC:2.7.7.-]                                                                 | Bacteria                            | -1.3                                                    | -1.3                                                |
| K02337          | DNA polymerase III subunit alpha [EC:2.7.7.7]                                            | Bacteria                            | -1.1                                                    | -1.3                                                |
| K01755          | argininosuccinate lyase [EC:4.3.2.1]                                                     | Bacteria                            | -0.8                                                    | -1.2                                                |
| K01000          | phospho-N-acetylmuramoyl-pentapeptide-transferase [EC:2.7.8.13]                          | Bacteria                            | -0.7                                                    | -1.0                                                |

<sup>a</sup>Taxon encompassing at least half the reads assigned to each K-number in Shotgun (all depths combined).

<sup>b</sup>Bias measures are calculated combining all depths.

**Supplementary Table 12** KEGG orthologs biased in favor of Fosmid Ends

| <i>K-Number</i> | <i>Function</i>                                             | <i>Consensus Taxon</i> <sup>a</sup> | <i>Bias</i> <sub>Fosmid Ends/Shotgun</sub> <sup>b</sup> | <i>Bias</i> <sub>Fosmid Ends/454</sub> <sup>b</sup> |
|-----------------|-------------------------------------------------------------|-------------------------------------|---------------------------------------------------------|-----------------------------------------------------|
| K10841          | DNA excision repair protein ERCC-6                          | Bacteria                            | $+\infty$                                               | $+\infty$                                           |
| K14676          | lysophospholipid hydrolase [EC:3.1.1.5]                     | cellular organisms                  | $+\infty$                                               | $+\infty$                                           |
| K08672          | proprotein convertase subtilisin/kexin type 6 [EC:3.4.21.-] | <i>Synechococcus</i> sp. WH 7805    | 5.1                                                     | $+\infty$                                           |

<sup>a</sup>Taxon encompassing at least half the reads assigned to each K-number in Fosmid Ends (all depths combined).

<sup>b</sup>Bias measures are calculated combining all depths.

Continued on next page

**Supplementary Table 12** KEGG orthologs biased in favor of Fosmid Ends – continued

| <i>K-Number</i> | <i>Function</i>                                                                     | <i>Consensus Taxon</i> <sup>a</sup> | <i>Bias</i> <sub>Fosmid Ends/Shotgun</sub> <sup>b</sup> | <i>Bias</i> <sub>Fosmid Ends/454</sub> <sup>b</sup> |
|-----------------|-------------------------------------------------------------------------------------|-------------------------------------|---------------------------------------------------------|-----------------------------------------------------|
| K04955          | hyperpolarization activated cyclic nucleotide-gated potassium channel 2             | Bacteria                            | 3.8                                                     | +∞                                                  |
| K04344          | voltage-dependent calcium channel P/Q type alpha-1A                                 | Bacteria                            | 3.5                                                     | +∞                                                  |
| K04877          | potassium voltage-gated channel Shaker-related subfamily A member 4                 | Bacteria                            | 2.5                                                     | +∞                                                  |
| K13172          | serine/arginine repetitive matrix protein 2                                         | Bacteria                            | 1.9                                                     | +∞                                                  |
| K10955          | intestinal mucin-2                                                                  | cellular organisms                  | 1.9                                                     | +∞                                                  |
| K13171          | serine/arginine repetitive matrix protein 1                                         | Bacteria                            | 1.8                                                     | +∞                                                  |
| K12311          | lysosomal alpha-mannosidase [EC:3.2.1.24]                                           | <i>Dictyostelium discoideum</i> AX4 | 5.8                                                     | 6.2                                                 |
| K11367          | chromodomain-helicase-DNA-binding protein 1 [EC:3.6.4.12]                           | root                                | 5.4                                                     | 5.7                                                 |
| K07129          |                                                                                     | Euryarchaeota                       | 3.8                                                     | 6.7                                                 |
| K11238          | cytokinesis protein                                                                 | root                                | 2.5                                                     | 6.6                                                 |
| K01115          | phospholipase D [EC:3.1.4.4]                                                        | root                                | 2.2                                                     | 6.5                                                 |
| K00078          | dihydrodiol dehydrogenase / D-xylose 1-dehydrogenase (NADP) [EC:1.3.1.20 1.1.1.179] | Bacteria                            | 3.1                                                     | 5.5                                                 |
| K07407          | alpha-galactosidase [EC:3.2.1.22]                                                   | Bacteria                            | 3.0                                                     | 5.4                                                 |
| K05747          | Wiskott-Aldrich syndrome protein                                                    | cellular organisms                  | 2.1                                                     | 6.2                                                 |
| K03646          | colicin import membrane protein                                                     | cellular organisms                  | 1.6                                                     | 6.7                                                 |
| K02566          | NagD protein                                                                        | Bacteria                            | 2.5                                                     | 5.5                                                 |
| K01183          | chitinase [EC:3.2.1.14]                                                             | cellular organisms                  | 1.4                                                     | 5.9                                                 |
| K03626          | nascent polypeptide-associated complex subunit alpha                                | cellular organisms                  | 2.1                                                     | 4.6                                                 |
| K03832          | periplasmic protein TonB                                                            | Bacteria                            | 1.8                                                     | 4.5                                                 |
| K09992          | hypothetical protein                                                                | Bacteria                            | 2.3                                                     | 3.5                                                 |
| K01408          | insulysin [EC:3.4.24.56]                                                            | cellular organisms                  | 2.1                                                     | 3.4                                                 |
| K01079          | phosphoserine phosphatase [EC:3.1.3.3]                                              | cellular organisms                  | 1.9                                                     | 3.2                                                 |
| K01134          | arylsulfatase A [EC:3.1.6.8]                                                        | Bacteria                            | 2.0                                                     | 3.0                                                 |
| K06896          |                                                                                     | Enterobacteriaceae                  | 1.6                                                     | 3.3                                                 |
| K00054          | hydroxymethylglutaryl-CoA reductase [EC:1.1.1.88]                                   | cellular organisms                  | 2.2                                                     | 2.3                                                 |
| K01138          | uncharacterized sulfatase [EC:3.1.6.-]                                              | Bacteria                            | 1.6                                                     | 2.8                                                 |
| K13787          | geranylgeranyl diphosphate synthase, type I [EC:2.5.1.1 2.5.1.10 2.5.1.29]          | cellular organisms                  | 1.8                                                     | 2.6                                                 |
| K07126          |                                                                                     | Bacteria                            | 1.4                                                     | 2.9                                                 |
| K06944          |                                                                                     | Archaea                             | 2.0                                                     | 2.3                                                 |
| K10817          | erythronolide synthase [EC:2.3.1.94]                                                | Bacteria                            | 1.4                                                     | 2.6                                                 |
| K02519          | translation initiation factor IF-2                                                  | Bacteria                            | 1.0                                                     | 1.5                                                 |

<sup>a</sup>Taxon encompassing at least half the reads assigned to each K-number in Fosmid Ends (all depths combined).

<sup>b</sup>Bias measures are calculated combining all depths.

No KEGG orthologs were significantly biased against Shotgun.

**Supplementary Table 13** KEGG orthologs biased in favor of Shotgun

| <i>K-Number</i> | <i>Function</i>                                                                        | <i>Consensus Taxon</i> <sup>a</sup>            | <i>Bias</i> <sub>Shotgun/Fosmid Ends</sub> <sup>b</sup> | <i>Bias</i> <sub>Shotgun/454</sub> <sup>b</sup> |
|-----------------|----------------------------------------------------------------------------------------|------------------------------------------------|---------------------------------------------------------|-------------------------------------------------|
| K00737          | beta-1,4-mannosyl-glycoprotein beta-1,4-N-acetylglucosaminyltransferase [EC:2.4.1.144] | Bacteria                                       | 3.6                                                     | 3.4                                             |
| K07276          | hypothetical protein                                                                   | Candidatus <i>Pelagibacter ubique</i> HTCC1062 | 2.4                                                     | 3.9                                             |
| K13497          | anthranilate synthase/phosphoribosyltransferase [EC:4.1.3.27 2.4.2.18]                 | Candidatus <i>Pelagibacter ubique</i>          | 1.8                                                     | 3.4                                             |
| K04744          | LPS-assembly protein                                                                   | Alphaproteobacteria                            | 1.3                                                     | 2.7                                             |

<sup>a</sup>Taxon encompassing at least half the reads assigned to each K-number in Shotgun (all depths combined).

<sup>b</sup>Bias measures are calculated combining all depths.

**Supplementary Table 14** KEGG orthologs biased against 454

| <i>K-Number</i> | <i>Function</i>                                         | <i>Consensus Taxon</i> <sup>a</sup> | <i>Bias</i> <sub>454/Fosmid Ends</sub> <sup>b</sup> | <i>Bias</i> <sub>454/Shotgun</sub> <sup>b</sup> |
|-----------------|---------------------------------------------------------|-------------------------------------|-----------------------------------------------------|-------------------------------------------------|
| K03933          | chitin-binding protein                                  | Bacteria                            | $-\infty$                                           | $-\infty$                                       |
| K04459          | dual specificity phosphatase [EC:3.1.3.16 3.1.3.48]     | root                                | $-\infty$                                           | $-\infty$                                       |
| K04573          | neurofilament medium polypeptide (neurofilament 3)      | cellular organisms                  | $-\infty$                                           | $-\infty$                                       |
| K05673          | ATP-binding cassette, subfamily C (CFTR/MRP), member 4  | Eukaryota                           | $-\infty$                                           | $-\infty$                                       |
| K05746          | enabled                                                 | cellular organisms                  | $-\infty$                                           | $-\infty$                                       |
| K05996          | carboxypeptidase T [EC:3.4.17.18]                       | Bacteria                            | $-\infty$                                           | $-\infty$                                       |
| K06400          | site-specific DNA recombinase                           | Bacteria                            | $-\infty$                                           | $-\infty$                                       |
| K06560          | mannose receptor, C type                                | Bacteria                            | $-\infty$                                           | $-\infty$                                       |
| K06867          |                                                         | cellular organisms                  | $-\infty$                                           | $-\infty$                                       |
| K06977          |                                                         | Bacteria                            | $-\infty$                                           | $-\infty$                                       |
| K07000          |                                                         | Gammaproteobacteria                 | $-\infty$                                           | $-\infty$                                       |
| K07221          | outer membrane porin                                    | Proteobacteria                      | $-\infty$                                           | $-\infty$                                       |
| K07579          | putative methylase                                      | Euryarchaeota                       | $-\infty$                                           | $-\infty$                                       |
| K08177          | MFS transporter, OFA family, oxalate/formate antiporter | Bacteria                            | $-\infty$                                           | $-\infty$                                       |
| K08217          | MFS transporter, DHA3 family, macrolide efflux protein  | Bacteria                            | $-\infty$                                           | $-\infty$                                       |
| K08287          | dual-specificity kinase [EC:2.7.12.1]                   | Eukaryota                           | $-\infty$                                           | $-\infty$                                       |
| K08827          | serine/threonine-protein kinase PRP4 [EC:2.7.11.1]      | Bacteria                            | $-\infty$                                           | $-\infty$                                       |
| K09087          | hairy and enhancer of split 2/6/7                       | Bacteria                            | $-\infty$                                           | $-\infty$                                       |
| K09291          | nucleoprotein TPR                                       | cellular organisms                  | $-\infty$                                           | $-\infty$                                       |
| K09506          | DnaJ homolog subfamily A member 5                       | Eukaryota                           | $-\infty$                                           | $-\infty$                                       |

<sup>a</sup>Taxon encompassing at least half the reads assigned to each K-number in Shotgun (all depths combined).

<sup>b</sup>Bias measures are calculated combining all depths.

Continued on next page

**Supplementary Table 14** KEGG orthologs biased against 454 – continued

| <i>K-Number</i> | <i>Function</i>                                                            | <i>Consensus Taxon</i> <sup>a</sup> | <i>Bias</i> <sub>454/Fosmid Ends</sub> <sup>b</sup> | <i>Bias</i> <sub>454/Shotgun</sub> <sup>b</sup> |
|-----------------|----------------------------------------------------------------------------|-------------------------------------|-----------------------------------------------------|-------------------------------------------------|
| K09584          | protein disulfide-isomerase A6<br>[EC:5.3.4.1]                             | Eukaryota                           | −∞                                                  | −∞                                              |
| K09921          | hypothetical protein                                                       | Proteobacteria                      | −∞                                                  | −∞                                              |
| K10297          | F-box protein 11                                                           | Bacteria                            | −∞                                                  | −∞                                              |
| K10385          | loricrin                                                                   | Bacteria                            | −∞                                                  | −∞                                              |
| K00851          | gluconokinase [EC:2.7.1.12]                                                | Bacteria                            | −∞                                                  | −∞                                              |
| K10421          | CAP-Gly domain-containing<br>linker protein 1                              | cellular organisms                  | −∞                                                  | −∞                                              |
| K10595          | E3 ubiquitin-protein ligase<br>HERC2 [EC:6.3.2.19]                         | cellular organisms                  | −∞                                                  | −∞                                              |
| K10955          | intestinal mucin-2                                                         | cellular organisms                  | −∞                                                  | −∞                                              |
| K11093          | U1 small nuclear ribonucleopro-<br>tein 70kDa                              | cellular organisms                  | −∞                                                  | −∞                                              |
| K11244          | cell wall integrity and stress re-<br>sponse component                     | cellular organisms                  | −∞                                                  | −∞                                              |
| K11429          | histone-lysine N-<br>methyltransferase SUV420H<br>[EC:2.1.1.43]            | cellular organisms                  | −∞                                                  | −∞                                              |
| K11494          | RCC1 and BTB domain-<br>containing protein                                 | cellular organisms                  | −∞                                                  | −∞                                              |
| K11675          | Ino eighty subunit 1                                                       | cellular organisms                  | −∞                                                  | −∞                                              |
| K11855          | ubiquitin carboxyl-terminal hy-<br>drolase 36/42 [EC:3.1.2.15]             | cellular organisms                  | −∞                                                  | −∞                                              |
| K12544          | S-layer protein                                                            | Bacteria                            | −∞                                                  | −∞                                              |
| K12571          | PAB-dependent poly(A)-<br>specific ribonuclease subunit 2<br>[EC:3.1.13.4] | Eukaryota                           | −∞                                                  | −∞                                              |
| K12618          | 5'-3' exoribonuclease 1<br>[EC:3.1.13.-]                                   | Eukaryota                           | −∞                                                  | −∞                                              |
| K12811          | ATP-dependent RNA helicase<br>DDX46/PRP5 [EC:3.6.4.13]                     | Eukaryota                           | −∞                                                  | −∞                                              |
| K12821          | pre-mRNA-processing factor 40                                              | Eukaryota                           | −∞                                                  | −∞                                              |
| K12893          | splicing factor, arginine/serine-<br>rich 4/5/6                            | cellular organisms                  | −∞                                                  | −∞                                              |
| K12896          | splicing factor, arginine/serine-<br>rich 7                                | Bacteria                            | −∞                                                  | −∞                                              |
| K13091          | RNA-binding protein 39                                                     | Eukaryota                           | −∞                                                  | −∞                                              |
| K13106          | pre-mRNA-splicing factor<br>CWC26                                          | cellular organisms                  | −∞                                                  | −∞                                              |
| K13165          | splicing factor, arginine/serine-<br>rich 12                               | Bacteria                            | −∞                                                  | −∞                                              |
| K13168          | splicing factor, arginine/serine-<br>rich 16                               | cellular organisms                  | −∞                                                  | −∞                                              |
| K13170          | splicing factor, arginine/serine-<br>rich 18                               | root                                | −∞                                                  | −∞                                              |
| K13171          | serine/arginine repetitive matrix<br>protein 1                             | Bacteria                            | −∞                                                  | −∞                                              |
| K13172          | serine/arginine repetitive matrix<br>protein 2                             | Bacteria                            | −∞                                                  | −∞                                              |

<sup>a</sup>Taxon encompassing at least half the reads assigned to each K-number in Shotgun (all depths combined).

<sup>b</sup>Bias measures are calculated combining all depths.

Continued on next page



**Supplementary Table 14** KEGG orthologs biased against 454 – continued

| <i>K-Number</i> | <i>Function</i>                                                                                                                         | <i>Consensus Taxon</i> <sup>a</sup> | <i>Bias</i> <sub>454/Fosmid Ends</sub> <sup>b</sup> | <i>Bias</i> <sub>454/Shotgun</sub> <sup>b</sup> |
|-----------------|-----------------------------------------------------------------------------------------------------------------------------------------|-------------------------------------|-----------------------------------------------------|-------------------------------------------------|
| K13173          | arginine and glutamate-rich protein 1                                                                                                   | cellular organisms                  | −∞                                                  | −∞                                              |
| K13276          | bacillopeptidase F [EC:3.4.21.-]                                                                                                        | Bacteria                            | −∞                                                  | −∞                                              |
| K13448          | calcium-binding protein CML                                                                                                             | cellular organisms                  | −∞                                                  | −∞                                              |
| K13507          | glycerol-3-phosphate O-acyltransferase / dihydroxyacetone phosphate acyltransferase [EC:2.3.1.15 2.3.1.42]                              | Dikarya                             | −∞                                                  | −∞                                              |
| K13908          | mucin-5B                                                                                                                                | cellular organisms                  | −∞                                                  | −∞                                              |
| K13909          | mucin-7                                                                                                                                 | cellular organisms                  | −∞                                                  | −∞                                              |
| K13911          | basic salivary proline-rich protein 1/2                                                                                                 | cellular organisms                  | −∞                                                  | −∞                                              |
| K14059          | integrase                                                                                                                               | Bacteria                            | −∞                                                  | −∞                                              |
| K14297          | nuclear pore complex protein Nup98-Nup96                                                                                                | cellular organisms                  | −∞                                                  | −∞                                              |
| K14306          | nuclear pore complex protein Nup62                                                                                                      | cellular organisms                  | −∞                                                  | −∞                                              |
| K14392          | sodium/pantothenate symporter cleavage and polyadenylation specificity factor subunit 6/7                                               | Bacteria                            | −∞                                                  | −∞                                              |
| K14398          |                                                                                                                                         | Bacteria                            | −∞                                                  | −∞                                              |
| K14469          | acrylyl-CoA reductase (NADPH) / 3-hydroxypropionyl-CoA dehydratase / 3-hydroxypropionyl-CoA synthetase [EC:1.3.1.84 4.2.1.116 6.2.1.36] | OM60 clade                          | −∞                                                  | −∞                                              |
| K00073          | ureidoglycolate dehydrogenase [EC:1.1.1.154]                                                                                            | Bacteria                            | −∞                                                  | −∞                                              |
| K01099          | phosphatidylinositol-bisphosphatase [EC:3.1.3.36]                                                                                       | cellular organisms                  | −∞                                                  | −∞                                              |
| K01120          | 3',5'-cyclic-nucleotide phosphodiesterase [EC:3.1.4.17]                                                                                 | cellular organisms                  | −∞                                                  | −∞                                              |
| K01178          | glucoamylase [EC:3.2.1.3]                                                                                                               | cellular organisms                  | −∞                                                  | −∞                                              |
| K01317          | acrosin [EC:3.4.21.10]                                                                                                                  | Bacteria                            | −∞                                                  | −∞                                              |
| K01427          | urease [EC:3.5.1.5]                                                                                                                     | <i>Prochlorococcus marinus</i>      | −∞                                                  | −∞                                              |
| K01514          | exopolyphosphatase [EC:3.6.1.11]                                                                                                        | Eukaryota                           | −∞                                                  | −∞                                              |
| K02184          | formin 2                                                                                                                                | cellular organisms                  | −∞                                                  | −∞                                              |
| K02330          | DNA polymerase beta subunit [EC:2.7.7.7 4.2.99.-]                                                                                       | cellular organisms                  | −∞                                                  | −∞                                              |
| K02331          | DNA polymerase phi subunit [EC:2.7.7.7]                                                                                                 | cellular organisms                  | −∞                                                  | −∞                                              |
| K02386          | flagella basal body P-ring formation protein FlgA                                                                                       | Bacteria                            | −∞                                                  | −∞                                              |
| K02397          | flagellar hook-associated protein 3 FlgL                                                                                                | Proteobacteria                      | −∞                                                  | −∞                                              |
| K02414          | flagellar hook-length control protein FliK                                                                                              | Bacteria                            | −∞                                                  | −∞                                              |

<sup>a</sup>Taxon encompassing at least half the reads assigned to each K-number in Shotgun (all depths combined).

<sup>b</sup>Bias measures are calculated combining all depths.

Continued on next page

**Supplementary Table 14** KEGG orthologs biased against 454 – continued

| <i>K</i> -Number | Function                                                                   | Consensus Taxon <sup>a</sup>                   | <i>Bias</i> <sub>454/Fosmid Ends</sub> <sup>b</sup> | <i>Bias</i> <sub>454/Shotgun</sub> <sup>b</sup> |
|------------------|----------------------------------------------------------------------------|------------------------------------------------|-----------------------------------------------------|-------------------------------------------------|
| K03208           | colanic acid biosynthesis glycosyl transferase WcaI                        | Bacteria                                       | −∞                                                  | −∞                                              |
| K03228           | type III secretion protein SctT                                            | Proteobacteria                                 | −∞                                                  | −∞                                              |
| K03260           | translation initiation factor eIF-4F                                       | cellular organisms                             | −∞                                                  | −∞                                              |
| K03284           | metal ion transporter, MIT family                                          | Archaea                                        | −∞                                                  | −∞                                              |
| K03328           | polysaccharide transporter, PST family                                     | Bacteria                                       | −∞                                                  | −∞                                              |
| K00404           | cb-type cytochrome c oxidase subunit I [EC:1.9.3.1]                        | Proteobacteria                                 | −∞                                                  | −∞                                              |
| K14325           | RNA-binding protein with serine-rich domain 1                              | Bacteria                                       | −9.3                                                | −7.7                                            |
| K13100           | pre-mRNA-splicing factor CWC22                                             | cellular organisms                             | −7.7                                                | −6.3                                            |
| K11294           | nucleolin                                                                  | Eukaryota                                      | −7.6                                                | −6.1                                            |
| K02407           | flagellar hook-associated protein 2                                        | Proteobacteria                                 | −7.2                                                | −6.5                                            |
| K13412           | calcium-dependent protein kinase [EC:2.7.11.1]                             | Apicomplexa                                    | −6.3                                                | −6.4                                            |
| K11901           | type VI secretion system protein ImpB                                      | Proteobacteria                                 | −7.1                                                | −5.5                                            |
| K03932           | polyhydroxybutyrate depolymerase                                           | Bacteria                                       | −6.8                                                | −5.7                                            |
| K09888           | cell division protein ZapA                                                 | <i>Candidatus Pelagibacter ubique</i> HTCC1062 | −5.7                                                | −6.4                                            |
| K12287           | MSHA biogenesis protein MshQ                                               | Bacteria                                       | −6.0                                                | −6.1                                            |
| K03646           | colicin import membrane protein                                            | Bacteria                                       | −6.7                                                | −5.1                                            |
| K07279           | hypothetical protein                                                       | Proteobacteria                                 | −6.4                                                | −5.4                                            |
| K13092           | nuclear protein NHN1                                                       | cellular organisms                             | −6.6                                                | −5.1                                            |
| K06237           | collagen, type IV, alpha                                                   | cellular organisms                             | −6.2                                                | −5.4                                            |
| K07288           | uncharacterized membrane protein                                           | Proteobacteria                                 | −6.2                                                | −5.3                                            |
| K06907           |                                                                            | unclassified T4-like viruses                   | −5.7                                                | −5.7                                            |
| K07029           |                                                                            | Bacteria                                       | −6.5                                                | −4.9                                            |
| K10380           | ankyrin                                                                    | cellular organisms                             | −6.7                                                | −4.5                                            |
| K04034           | anaerobic magnesium-protoporphyrin IX monomethyl ester cyclase [EC:4.-.-.] | Bacteria                                       | −5.6                                                | −5.4                                            |
| K10352           | myosin heavy chain                                                         | cellular organisms                             | −6.3                                                | −4.6                                            |
| K11941           | glucans biosynthesis protein C [EC:2.1.-.-]                                | Bacteria                                       | −6.2                                                | −4.7                                            |
| K05315           | voltage-dependent calcium channel alpha 1, invertebrate                    | Bacteria                                       | −6.5                                                | −4.4                                            |
| K11238           | cytokinesis protein                                                        | cellular organisms                             | −6.6                                                | −4.2                                            |
| K08234           | glyoxylase I family protein                                                | Bacteria                                       | −6.2                                                | −4.5                                            |
| K08819           | Cdc2-related kinase, arginine/serine-rich [EC:2.7.11.22]                   | cellular organisms                             | −6.2                                                | −4.4                                            |

<sup>a</sup>Taxon encompassing at least half the reads assigned to each K-number in Shotgun (all depths combined).

<sup>b</sup>Bias measures are calculated combining all depths.

Continued on next page

**Supplementary Table 14** KEGG orthologs biased against 454 – continued

| <i>K</i> -Number | Function                                                        | Consensus Taxon <sup>a</sup>          | <i>Bias</i> <sub>454/Fosmid Ends</sub> <sup>b</sup> | <i>Bias</i> <sub>454/Shotgun</sub> <sup>b</sup> |
|------------------|-----------------------------------------------------------------|---------------------------------------|-----------------------------------------------------|-------------------------------------------------|
| K07313           | serine/threonine protein phosphatase 1 [EC:3.1.3.16]            | Bacteria                              | -6.2                                                | -4.4                                            |
| K01975           | 2'-5' RNA ligase [EC:6.5.1.-]                                   | cellular organisms                    | -5.2                                                | -5.3                                            |
| K01183           | chitinase [EC:3.2.1.14]                                         | Bacteria                              | -5.9                                                | -4.4                                            |
| K09607           | immune inhibitor A [EC:3.4.24.-]                                | Bacteria                              | -6.2                                                | -4.2                                            |
| K01281           | X-Pro dipeptidyl-peptidase [EC:3.4.14.11]                       | Actinomycetales                       | -6.4                                                | -3.8                                            |
| K05747           | Wiskott-Aldrich syndrome protein                                | cellular organisms                    | -6.2                                                | -4.1                                            |
| K10908           | DNA-directed RNA polymerase, mitochondrial [EC:2.7.7.6]         | cellular organisms                    | -5.9                                                | -4.4                                            |
| K12567           | titin [EC:2.7.11.1]                                             | cellular organisms                    | -6.3                                                | -3.9                                            |
| K11653           | AT-rich interactive domain-containing protein 1                 | cellular organisms                    | -5.7                                                | -4.4                                            |
| K03651           | Icc protein                                                     | Gamma proteobacteria                  | -5.7                                                | -4.3                                            |
| K08296           | phosphohistidine phosphatase [EC:3.1.3.-]                       | Bacteria                              | -5.5                                                | -4.4                                            |
| K14376           | poly(A) polymerase [EC:2.7.7.19]                                | Eukaryota                             | -6.1                                                | -3.8                                            |
| K00689           | dextranucrase [EC:2.4.1.5]                                      | Bacteria                              | -5.4                                                | -4.5                                            |
| K08153           | MFS transporter, DHA1 family, multidrug resistance protein      | Bacteria                              | -6.2                                                | -3.5                                            |
| K01617           | 4-oxalocrotonate decarboxylase [EC:4.1.1.77]                    | Rhizobiales                           | -4.7                                                | -4.9                                            |
| K08720           | outer membrane protein OmpU                                     | Candidatus <i>Pelagibacter ubique</i> | -4.2                                                | -5.5                                            |
| K07141           |                                                                 | Proteobacteria                        | -4.9                                                | -4.6                                            |
| K01781           | mandelate racemase [EC:5.1.2.2]                                 | Proteobacteria                        | -5.2                                                | -4.3                                            |
| K13668           | phosphatidylinositol alpha-1,6-mannosyltransferase [EC:2.4.1.-] | Candidatus <i>Pelagibacter ubique</i> | -4.5                                                | -4.9                                            |
| K05303           | macrocin O-methyltransferase [EC:2.1.1.101]                     | Bacteria                              | -4.7                                                | -4.6                                            |
| K09811           | cell division transport system permease protein                 | Bacteria                              | -5.3                                                | -4.0                                            |
| K10799           | tankyrase [EC:2.4.2.30]                                         | cellular organisms                    | -5.2                                                | -4.1                                            |
| K09252           | feruloyl esterase [EC:3.1.1.73]                                 | Proteobacteria                        | -5.5                                                | -3.7                                            |
| K08589           | gingipain R [EC:3.4.22.37]                                      | <i>Porphyromonas gingivalis</i>       | -4.9                                                | -4.2                                            |
| K02183           | calmodulin                                                      | Eukaryota                             | -5.2                                                | -3.9                                            |
| K13735           | adhesin/invasin                                                 | Bacteria                              | -4.2                                                | -4.9                                            |
| K01055           | 3-oxoadipate enol-lactonase [EC:3.1.1.24]                       | Proteobacteria                        | -4.9                                                | -4.0                                            |
| K12600           | superkiller protein 3                                           | Bacteria                              | -4.7                                                | -4.1                                            |
| K09774           | lipopolysaccharide export system protein LptA                   | Proteobacteria                        | -5.0                                                | -3.7                                            |
| K06636           | structural maintenance of chromosome 1                          | Eukaryota                             | -4.7                                                | -3.9                                            |
| K07243           | high-affinity iron transporter                                  | Bacteria                              | -4.7                                                | -3.8                                            |
| K07404           | 6-phosphogluconolactonase [EC:3.1.1.31]                         | Bacteria                              | -4.7                                                | -3.5                                            |

<sup>a</sup>Taxon encompassing at least half the reads assigned to each K-number in Shotgun (all depths combined).

<sup>b</sup>Bias measures are calculated combining all depths.

Continued on next page

**Supplementary Table 14** KEGG orthologs biased against 454 – continued

| <i>K</i> -Number | Function                                                                                                                 | Consensus Taxon <sup>a</sup>         | <i>Bias</i> <sub>454/Fosmid Ends</sub> <sup>b</sup> | <i>Bias</i> <sub>454/Shotgun</sub> <sup>b</sup> |
|------------------|--------------------------------------------------------------------------------------------------------------------------|--------------------------------------|-----------------------------------------------------|-------------------------------------------------|
| K01174           | micrococcal nuclease<br>[EC:3.1.31.1]                                                                                    | cellular organisms                   | -4.2                                                | -4.1                                            |
| K03571           | rod shape-determining protein<br>MreD                                                                                    | Alphaproteobacteria                  | -3.7                                                | -4.5                                            |
| K00949           | thiamine pyrophosphokinase<br>[EC:2.7.6.2]                                                                               | Bacteria                             | -5.0                                                | -3.2                                            |
| K14572           | midasin                                                                                                                  | cellular organisms                   | -4.4                                                | -3.8                                            |
| K02315           | DNA replication protein DnaC                                                                                             | Bacteria                             | -3.7                                                | -4.4                                            |
| K14645           | serine protease [EC:3.4.21.-]                                                                                            | Bacteria                             | -4.6                                                | -3.4                                            |
| K02422           | flagellar protein FliS                                                                                                   | Bacteria                             | -4.6                                                | -3.5                                            |
| K00441           | coenzyme F420 hydrogenase<br>beta subunit [EC:1.12.98.1]                                                                 | Bacteria                             | -4.2                                                | -3.9                                            |
| K11647           | SWI/SNF-related matrix-<br>associated actin-dependent reg-<br>ulator of chromatin subfamily A<br>member 2/4 [EC:3.6.4.-] | Eukaryota                            | -4.2                                                | -3.9                                            |
| K02843           | heptosyltransferase II [EC:2.4.-.-<br>]                                                                                  | Proteobacteria                       | -4.2                                                | -3.9                                            |
| K12603           | CCR4-NOT transcription com-<br>plex subunit 6 [EC:3.1.-.-]                                                               | cellular organisms                   | -4.5                                                | -3.4                                            |
| K01406           | serralysin [EC:3.4.24.40]                                                                                                | Bacteria                             | -4.3                                                | -3.6                                            |
| K02396           | flagellar hook-associated protein<br>1 FlgK                                                                              | Proteobacteria                       | -4.3                                                | -3.5                                            |
| K03287           | outer membrane factor, OMF<br>family                                                                                     | <i>Prochlorococcus mari-<br/>nus</i> | -3.6                                                | -4.2                                            |
| K02406           | flagellin                                                                                                                | Bacteria                             | -4.5                                                | -3.3                                            |
| K06994           | putative drug exporter of the<br>RND superfamily                                                                         | Bacteria                             | -5.0                                                | -2.6                                            |
| K07004           |                                                                                                                          | Bacteria                             | -4.7                                                | -3.0                                            |
| K09790           | hypothetical protein                                                                                                     | Bacteria                             | -4.4                                                | -3.1                                            |
| K03546           | exonuclease SbcC                                                                                                         | cellular organisms                   | -3.9                                                | -3.5                                            |
| K01090           | protein phosphatase<br>[EC:3.1.3.16]                                                                                     | cellular organisms                   | -4.6                                                | -2.9                                            |
| K10395           | kinesin family member<br>4/7/21/27                                                                                       | Eukaryota                            | -4.5                                                | -2.9                                            |
| K01453           |                                                                                                                          | Proteobacteria                       | -4.0                                                | -3.4                                            |
| K01567           |                                                                                                                          | Bacteria                             | -4.2                                                | -3.1                                            |
| K00231           | protoporphyrinogen oxidase<br>[EC:1.3.3.4]                                                                               | Bacteria                             | -4.2                                                | -3.1                                            |
| K03832           | periplasmic protein TonB                                                                                                 | Bacteria                             | -4.5                                                | -2.7                                            |
| K10592           | E3 ubiquitin-protein ligase<br>HUWE1 [EC:6.3.2.19]                                                                       | Eukaryota                            | -3.9                                                | -3.2                                            |
| K14822           | rRNA-processing protein CGR1                                                                                             | cellular organisms                   | -3.9                                                | -3.2                                            |
| K03626           | nascent polypeptide-associated<br>complex subunit alpha                                                                  | cellular organisms                   | -4.6                                                | -2.5                                            |
| K03770           | peptidyl-prolyl cis-trans iso-<br>merase D [EC:5.2.1.8]                                                                  | Proteobacteria                       | -3.0                                                | -4.1                                            |
| K00908           | Ca <sup>2+</sup> /calmodulin-dependent<br>protein kinase [EC:2.7.11.17]                                                  | Eukaryota                            | -3.9                                                | -3.0                                            |
| K13730           | internalin A                                                                                                             | Bacteria                             | -3.8                                                | -3.1                                            |

<sup>a</sup>Taxon encompassing at least half the reads assigned to each K-number in Shotgun (all depths combined).

<sup>b</sup>Bias measures are calculated combining all depths.

Continued on next page

**Supplementary Table 14** KEGG orthologs biased against 454 – continued

| <i>K</i> -Number | Function                                                                      | Consensus Taxon <sup>a</sup>         | <i>Bias</i> <sub>454/Fosmid Ends</sub> <sup>b</sup> | <i>Bias</i> <sub>454/Shotgun</sub> <sup>b</sup> |
|------------------|-------------------------------------------------------------------------------|--------------------------------------|-----------------------------------------------------|-------------------------------------------------|
| K08151           | MFS transporter, DHA1 family, tetracycline resistance protein                 | Bacteria                             | -4.2                                                | -2.7                                            |
| K00477           | phytanoyl-CoA hydroxylase [EC:1.14.11.18]                                     | Proteobacteria                       | -3.8                                                | -2.9                                            |
| K03726           | helicase [EC:3.6.4.-]                                                         | <i>Nitrosopumilus maritimus</i> SCM1 | -4.0                                                | -2.8                                            |
| K03454           | mitochondrial carrier protein, MC family                                      | Dikarya                              | -3.7                                                | -3.0                                            |
| K07403           | membrane-bound serine protease (ClpP class)                                   | Bacteria                             | -3.9                                                | -2.8                                            |
| K09228           | KRAB domain-containing zinc finger protein                                    | Dikarya                              | -3.3                                                | -3.1                                            |
| K13007           | Fuc2NAc and GlcNAc transferase [EC:2.4.1.-]                                   | Cyanobacteria                        | -3.2                                                | -3.2                                            |
| K07552           | MFS transporter, DHA1 family, bicyclomycin/chloramphenicol resistance protein | Proteobacteria                       | -3.5                                                | -2.8                                            |
| K01684           | galactonate dehydratase [EC:4.2.1.6]                                          | Bacteria                             | -3.7                                                | -2.5                                            |
| K01004           | phosphatidylcholine synthase [EC:2.7.8.24]                                    | Proteobacteria                       | -3.7                                                | -2.4                                            |
| K03446           | MFS transporter, DHA2 family, multidrug resistance protein B                  | Proteobacteria                       | -3.6                                                | -2.6                                            |
| K02841           | heptosyltransferase I [EC:2.4.-.-]                                            | Proteobacteria                       | -2.6                                                | -3.6                                            |
| K08857           | NIMA (never in mitosis gene a)-related kinase [EC:2.7.11.1]                   | Eukaryota                            | -3.7                                                | -2.4                                            |
| K00087           | xanthine dehydrogenase molybdenum-binding subunit [EC:1.17.1.4]               | Bacteria                             | -3.6                                                | -2.4                                            |
| K06889           |                                                                               | Proteobacteria                       | -2.9                                                | -3.2                                            |
| K06919           | putative DNA primase/helicase                                                 | Bacteria                             | -3.5                                                | -2.5                                            |
| K03769           | peptidyl-prolyl cis-trans isomerase C [EC:5.2.1.8]                            | Proteobacteria                       | -3.3                                                | -2.6                                            |
| K01238           |                                                                               | Bacteroidetes                        | -3.0                                                | -2.9                                            |
| K08884           | serine/threonine protein kinase, bacterial [EC:2.7.11.1]                      | Bacteria                             | -3.5                                                | -2.4                                            |
| K07068           |                                                                               | Bacteria                             | -3.5                                                | -2.3                                            |
| K00982           | glutamate-ammonia-ligase adenyltransferase [EC:2.7.7.42]                      | Proteobacteria                       | -3.6                                                | -2.1                                            |
| K09800           | hypothetical protein                                                          | <i>Prochlorococcus marinus</i>       | -3.1                                                | -2.5                                            |
| K07001           |                                                                               | Bacteria                             | -3.2                                                | -2.4                                            |
| K00924           |                                                                               | Bacteria                             | -3.4                                                | -2.1                                            |
| K01467           | beta-lactamase [EC:3.5.2.6]                                                   | Bacteria                             | -3.1                                                | -2.4                                            |
| K12960           | 5-methylthioadenosine/S-adenosylhomocysteine deaminase [EC:3.5.4.- 3.5.4.28]  | Bacteria                             | -3.2                                                | -2.3                                            |
| K01133           | choline-sulfatase [EC:3.1.6.6]                                                | Proteobacteria                       | -3.5                                                | -1.9                                            |
| K05882           | aryl-alcohol dehydrogenase (NADP+) [EC:1.1.1.91]                              | Proteobacteria                       | -3.0                                                | -2.4                                            |

<sup>a</sup>Taxon encompassing at least half the reads assigned to each K-number in Shotgun (all depths combined).

<sup>b</sup>Bias measures are calculated combining all depths.

Continued on next page

**Supplementary Table 14** KEGG orthologs biased against 454 – continued

| <i>K</i> -Number | Function                                                                                | Consensus Taxon <sup>a</sup>          | <i>Bias</i> <sub>454/Fosmid Ends</sub> <sup>b</sup> | <i>Bias</i> <sub>454/Shotgun</sub> <sup>b</sup> |
|------------------|-----------------------------------------------------------------------------------------|---------------------------------------|-----------------------------------------------------|-------------------------------------------------|
| K07263           | zinc protease [EC:3.4.99.-]                                                             | Bacteria                              | -3.2                                                | -2.1                                            |
| K07152           |                                                                                         | Proteobacteria                        | -2.9                                                | -2.4                                            |
| K03006           | DNA-directed RNA polymerase II subunit RPB1 [EC:2.7.7.6]                                | Eukaryota                             | -2.8                                                | -2.4                                            |
| K02014           | iron complex outer membrane receptor protein                                            | Proteobacteria                        | -2.8                                                | -2.3                                            |
| K03406           | methyl-accepting chemotaxis protein                                                     | Proteobacteria                        | -2.6                                                | -2.3                                            |
| K03927           | carboxylesterase type B [EC:3.1.1.1]                                                    | Proteobacteria                        | -2.9                                                | -2.0                                            |
| K07091           | lipopolysaccharide export system permease protein                                       | Candidatus <i>Pelagibacter ubique</i> | -1.9                                                | -3.0                                            |
| K01126           | glycerophosphoryl diester phosphodiesterase [EC:3.1.4.46]                               | Bacteria                              | -2.5                                                | -2.3                                            |
| K06236           | collagen, type I/II/III/V/XI, alpha                                                     | cellular organisms                    | -2.6                                                | -2.2                                            |
| K12823           | ATP-dependent RNA helicase DDX5/DBP2 [EC:3.6.4.13]                                      | Eukaryota                             | -3.4                                                | -1.4                                            |
| K08680           | 2-succinyl-6-hydroxy-2,4-cyclohexadiene-1-carboxylate synthase [EC:4.2.99.20]           | Bacteria                              | -2.4                                                | -2.3                                            |
| K00983           | N-acylneuraminate cytidylyl-transferase [EC:2.7.7.43]                                   | Bacteria                              | -2.0                                                | -2.7                                            |
| K10408           | dynein heavy chain, axonemal                                                            | Trypanosomatidae                      | -2.9                                                | -1.7                                            |
| K06178           | ribosomal large subunit pseudouridine synthase B [EC:5.4.99.12]                         | Proteobacteria                        | -2.8                                                | -1.8                                            |
| K00754           |                                                                                         | Bacteria                              | -1.9                                                | -2.7                                            |
| K08282           | non-specific serine/threonine protein kinase [EC:2.7.11.1]                              | cellular organisms                    | -2.6                                                | -1.9                                            |
| K01113           | alkaline phosphatase D [EC:3.1.3.1]                                                     | Bacteria                              | -2.6                                                | -1.9                                            |
| K07025           | putative hydrolase of the HAD superfamily                                               | Proteobacteria                        | -2.7                                                | -1.7                                            |
| K07126           |                                                                                         | Bacteria                              | -2.9                                                | -1.5                                            |
| K00077           | 2-dehydropantoate 2-reductase [EC:1.1.1.169]                                            | Bacteria                              | -2.6                                                | -1.8                                            |
| K07011           |                                                                                         | Bacteria                              | -2.1                                                | -2.2                                            |
| K07024           |                                                                                         | Bacteria                              | -2.7                                                | -1.6                                            |
| K00849           | galactokinase [EC:2.7.1.6]                                                              | Bacteria                              | -2.6                                                | -1.7                                            |
| K03771           | peptidyl-prolyl cis-trans isomerase SurA [EC:5.2.1.8]                                   | Proteobacteria                        | -2.0                                                | -2.3                                            |
| K01768           | adenylate cyclase [EC:4.6.1.1]                                                          | Proteobacteria                        | -2.3                                                | -1.9                                            |
| K00320           | coenzyme F420-dependent N5,N10-methenyltetrahydromethanopterin reductase [EC:1.5.99.11] | Bacteria                              | -2.5                                                | -1.8                                            |
| K01136           | iduronate 2-sulfatase [EC:3.1.6.13]                                                     | Bacteria                              | -2.9                                                | -1.3                                            |
| K01179           | endoglucanase [EC:3.2.1.4]                                                              | Bacteria                              | -2.5                                                | -1.7                                            |

<sup>a</sup>Taxon encompassing at least half the reads assigned to each K-number in Shotgun (all depths combined).

<sup>b</sup>Bias measures are calculated combining all depths.

Continued on next page

**Supplementary Table 14** KEGG orthologs biased against 454 – continued

| <i>K</i> -Number | Function                                                                         | Consensus Taxon <sup>a</sup>                   | <i>Bias</i> <sub>454/Fosmid Ends</sub> <sup>b</sup> | <i>Bias</i> <sub>454/Shotgun</sub> <sup>b</sup> |
|------------------|----------------------------------------------------------------------------------|------------------------------------------------|-----------------------------------------------------|-------------------------------------------------|
| K08776           | puromycin-sensitive aminopeptidase [EC:3.4.11.-]                                 | <i>Nitrosopumilus maritimus</i> SCM1           | -2.7                                                | -1.5                                            |
| K03833           | selenocysteine-specific elongation factor                                        | Bacteria                                       | -2.2                                                | -1.9                                            |
| K04744           | LPS-assembly protein                                                             | Alphaproteobacteria                            | -1.4                                                | -2.7                                            |
| K04763           | integrase/recombinase XerD                                                       | Bacteria                                       | -2.6                                                | -1.4                                            |
| K07031           |                                                                                  | Bacteria                                       | -2.4                                                | -1.5                                            |
| K02674           | type IV pilus assembly protein PilY1                                             | Candidatus <i>Pelagibacter ubique</i>          | -1.9                                                | -1.9                                            |
| K07749           | formyl-CoA transferase [EC:2.8.3.16]                                             | Proteobacteria                                 | -2.4                                                | -1.4                                            |
| K00067           | dTDP-4-dehydrorhamnose reductase [EC:1.1.1.133]                                  | Bacteria                                       | -1.7                                                | -1.9                                            |
| K00517           |                                                                                  | Proteobacteria                                 | -2.1                                                | -1.5                                            |
| K11720           | lipopolysaccharide export system permease protein                                | Candidatus <i>Pelagibacter ubique</i> HTCC1062 | -1.0                                                | -2.5                                            |
| K00837           |                                                                                  | Bacteria                                       | -2.2                                                | -1.4                                            |
| K03307           | solute:Na <sup>+</sup> symporter, SSS family                                     | Bacteria                                       | -2.2                                                | -1.3                                            |
| K00599           |                                                                                  | Bacteria                                       | -1.9                                                | -1.6                                            |
| K01130           | arylsulfatase [EC:3.1.6.1]                                                       | Bacteria                                       | -2.5                                                | -0.8                                            |
| K06148           | ATP-binding cassette, subfamily C, bacterial                                     | Bacteria                                       | -1.6                                                | -1.7                                            |
| K00912           | tetraacyldisaccharide 4'-kinase [EC:2.7.1.130]                                   | Alphaproteobacteria                            | -1.5                                                | -1.8                                            |
| K07124           |                                                                                  | Bacteria                                       | -1.5                                                | -1.7                                            |
| K00100           |                                                                                  | Proteobacteria                                 | -1.9                                                | -1.3                                            |
| K09815           | zinc transport system substrate-binding protein                                  | Proteobacteria                                 | -1.5                                                | -1.6                                            |
| K02319           | DNA polymerase I [EC:2.7.7.7]                                                    | T4-like viruses                                | -1.7                                                | -1.2                                            |
| K01692           | enoyl-CoA hydratase [EC:4.2.1.17]                                                | Proteobacteria                                 | -1.9                                                | -1.0                                            |
| K02517           | lipid A biosynthesis lauroyl acyltransferase [EC:2.3.1.-]                        | Proteobacteria                                 | -1.0                                                | -1.8                                            |
| K03750           | molybdopterin biosynthesis protein MoeA                                          | Proteobacteria                                 | -1.5                                                | -1.2                                            |
| K00979           | 3-deoxy-manno-octulosonate cytidyltransferase (CMP-KDO synthetase) [EC:2.7.7.38] | Proteobacteria                                 | -1.1                                                | -1.5                                            |
| K06902           | MFS transporter, UMF1 family                                                     | Bacteria                                       | -1.6                                                | -1.0                                            |
| K01426           | amidase [EC:3.5.1.4]                                                             | Proteobacteria                                 | -1.6                                                | -0.7                                            |
| K07003           |                                                                                  | Proteobacteria                                 | -1.4                                                | -0.8                                            |
| K02519           | translation initiation factor IF-2                                               | Bacteria                                       | -1.5                                                | -0.5                                            |
| K00059           | 3-oxoacyl-[acyl-carrier protein] reductase [EC:1.1.1.100]                        | Bacteria                                       | -1.1                                                | -0.7                                            |
| K00540           |                                                                                  | Bacteria                                       | -0.5                                                | -0.7                                            |

<sup>a</sup>Taxon encompassing at least half the reads assigned to each K-number in Shotgun (all depths combined).

<sup>b</sup>Bias measures are calculated combining all depths.

**Supplementary Table 15** KEGG orthologs biased in favor of 454

| <i>K</i> -Number | Function                                                                      | Consensus Taxon <sup>a</sup>                   | <i>Bias</i> <sub>454/Fosmid Ends</sub> <sup>b</sup> | <i>Bias</i> <sub>454/Shotgun</sub> <sup>b</sup> |
|------------------|-------------------------------------------------------------------------------|------------------------------------------------|-----------------------------------------------------|-------------------------------------------------|
| K01429           | urease subunit beta [EC:3.5.1.5]                                              | <i>Prochlorococcus marinus</i>                 | +∞                                                  | 3.2                                             |
| K00777           |                                                                               | Candidatus <i>Pelagibacter ubique</i>          | 3.5                                                 | 2.3                                             |
| K08641           | D-alanyl-D-alanine dipeptidase [EC:3.4.13.-]                                  | <i>Prochlorococcus marinus</i>                 | 3.1                                                 | 1.2                                             |
| K05578           | NADH dehydrogenase I subunit 6 [EC:1.6.5.3]                                   | <i>Prochlorococcus marinus</i>                 | 2.9                                                 | 1.3                                             |
| K02705           | photosystem II CP43 chlorophyll apoprotein                                    | <i>Prochlorococcus marinus</i>                 | 2.4                                                 | 1.5                                             |
| K07769           | two-component system, OmpR family, sensor histidine kinase NblS [EC:2.7.13.3] | <i>Prochlorococcus marinus</i>                 | 2.9                                                 | 1.0                                             |
| K00304           | sarcosine oxidase, subunit delta [EC:1.5.3.1]                                 | Candidatus <i>Pelagibacter ubique</i> HTCC1062 | 1.6                                                 | 2.1                                             |
| K01428           | urease subunit alpha [EC:3.5.1.5]                                             | Bacteria                                       | 2.3                                                 | 0.9                                             |
| K00394           | adenylylsulfate reductase, subunit A [EC:1.8.99.2]                            | Candidatus <i>Pelagibacter ubique</i> HTCC1062 | 2.1                                                 | 1.0                                             |
| K00412           | ubiquinol-cytochrome c reductase cytochrome b subunit [EC:1.10.2.2]           | Alphaproteobacteria                            | 2.0                                                 | 0.8                                             |
| K03798           | cell division protease FtsH [EC:3.4.24.-]                                     | Cyanobacteria                                  | 2.0                                                 | 0.7                                             |
| K01696           | tryptophan synthase beta chain [EC:4.2.1.20]                                  | Bacteria                                       | 1.8                                                 | 0.8                                             |
| K01662           | 1-deoxy-D-xylulose-5-phosphate synthase [EC:2.2.1.7]                          | Bacteria                                       | 1.9                                                 | 0.5                                             |
| K02690           | photosystem I P700 chlorophyll a apoprotein A2                                | Cyanobacteria                                  | 1.3                                                 | 1.0                                             |
| K02111           | F-type H <sup>+</sup> -transporting ATPase subunit alpha [EC:3.6.3.14]        | Bacteria                                       | 1.3                                                 | 0.8                                             |
| K04043           | molecular chaperone DnaK                                                      | Bacteria                                       | 1.5                                                 | 0.6                                             |
| K04077           | chaperonin GroEL                                                              | Bacteria                                       | 1.5                                                 | 0.5                                             |
| K02274           | cytochrome c oxidase subunit I [EC:1.9.3.1]                                   | Bacteria                                       | 0.9                                                 | 1.0                                             |
| K00962           | polyribonucleotide nucleotidyltransferase [EC:2.7.7.8]                        | Bacteria                                       | 1.3                                                 | 0.6                                             |
| K06207           | GTP-binding protein                                                           | Bacteria                                       | 1.3                                                 | 0.6                                             |
| K03046           | DNA-directed RNA polymerase subunit beta' [EC:2.7.7.6]                        | Bacteria                                       | 1.2                                                 | 0.7                                             |
| K02469           | DNA gyrase subunit A [EC:5.99.1.3]                                            | Cyanobacteria                                  | 1.2                                                 | 0.6                                             |
| K03070           | preprotein translocase subunit SecA                                           | Bacteria                                       | 1.3                                                 | 0.5                                             |
| K01937           | CTP synthase [EC:6.3.4.2]                                                     | Bacteria                                       | 1.2                                                 | 0.6                                             |
| K01740           | O-acetylhomoserine (thiol)-lyase [EC:2.5.1.49]                                | Bacteria                                       | 1.2                                                 | 0.6                                             |
| K03569           | rod shape-determining protein MreB and related proteins                       | Bacteria                                       | 1.0                                                 | 0.7                                             |

<sup>a</sup>Taxon encompassing at least half the reads assigned to each K-number in 454 (all depths combined).

<sup>b</sup>Bias measures are calculated combining all depths.

Continued on next page



**Supplementary Table 15** KEGG orthologs biased in favor of 454 – continued

| <i>K-Number</i> | <i>Function</i>                                                          | <i>Consensus Taxon</i> <sup>a</sup>  | <i>Bias</i> <sub>454/Fosmid Ends</sub> <sup>b</sup> | <i>Bias</i> <sub>454/Shotgun</sub> <sup>b</sup> |
|-----------------|--------------------------------------------------------------------------|--------------------------------------|-----------------------------------------------------|-------------------------------------------------|
| K01955          | carbamoyl-phosphate synthase<br>large subunit [EC:6.3.5.5]               | Bacteria                             | 1.1                                                 | 0.6                                             |
| K01649          | 2-isopropylmalate synthase<br>[EC:2.3.3.13]                              | Bacteria                             | 1.1                                                 | 0.5                                             |
| K01895          | acetyl-CoA synthetase<br>[EC:6.2.1.1]                                    | Bacteria                             | 1.1                                                 | 0.5                                             |
| K03703          | excinuclease ABC subunit C                                               | Cyanobacteria                        | 1.1                                                 | 0.5                                             |
| K00284          | glutamate synthase (ferredoxin)<br>[EC:1.4.7.1]                          | <i>Prochlorococcus mari-<br/>nus</i> | 0.9                                                 | 0.7                                             |
| K02358          | elongation factor EF-Tu<br>[EC:3.6.5.3]                                  | Bacteria                             | 0.9                                                 | 0.7                                             |
| K03043          | DNA-directed RNA polymerase<br>subunit beta [EC:2.7.7.6]                 | Bacteria                             | 1.0                                                 | 0.6                                             |
| K00281          | glycine dehydrogenase<br>[EC:1.4.4.2]                                    | Bacteria                             | 0.9                                                 | 0.7                                             |
| K03702          | excinuclease ABC subunit B                                               | Bacteria                             | 0.9                                                 | 0.6                                             |
| K02112          | F-type H <sup>+</sup> -transporting ATPase<br>subunit beta [EC:3.6.3.14] | Bacteria                             | 0.8                                                 | 0.7                                             |
| K03701          | excinuclease ABC subunit A                                               | Bacteria                             | 0.8                                                 | 0.6                                             |
| K02355          | elongation factor EF-G<br>[EC:3.6.5.3]                                   | Bacteria                             | 0.6                                                 | 0.8                                             |
| K01687          | dihydroxy-acid dehydratase<br>[EC:4.2.1.9]                               | Bacteria                             | 0.8                                                 | 0.5                                             |
| K01873          | valyl-tRNA synthetase<br>[EC:6.1.1.9]                                    | Bacteria                             | 0.7                                                 | 0.6                                             |
| K01338          | ATP-dependent Lon protease<br>[EC:3.4.21.53]                             | Proteobacteria                       | 0.7                                                 | 0.6                                             |

<sup>a</sup>Taxon encompassing at least half the reads assigned to each K-number in 454 (all depths combined).

<sup>b</sup>Bias measures are calculated combining all depths.

## Figures

### *List of Figures*

|   |                                                                                                                                           |    |
|---|-------------------------------------------------------------------------------------------------------------------------------------------|----|
| 1 | Taxonomic comparison of HOT 179 libraries using <b>blastx</b> . . . . .                                                                   | 27 |
| 2 | Taxonomic comparison of HOT 186 libraries using <b>blastn</b> . . . . .                                                                   | 28 |
| 3 | Taxonomic comparison of HOT 186 libraries using <b>blastx</b> . . . . .                                                                   | 29 |
| 4 | Distribution of the bias measure using <b>blastn</b> . . . . .                                                                            | 30 |
| 5 | Distribution of the bias measure using <b>blastx</b> . . . . .                                                                            | 31 |
| 6 | GC contents versus bias for HOT 179, 25 m and 75 m ( <b>blastn</b> ) . . . . .                                                            | 32 |
| 7 | GC contents versus bias for HOT 179, 125 m (original and split reads, <b>blastn</b> ) . . .                                               | 33 |
| 8 | GC contents versus bias for HOT 186, 25 m and 75 m ( <b>blastn</b> ) . . . . .                                                            | 34 |
| 9 | GC contents versus bias for HOT 186, 110 m and 500 m ( <b>blastn</b> ), as well as the photic zone of HOT 179 ( <b>blastx</b> ) . . . . . | 35 |

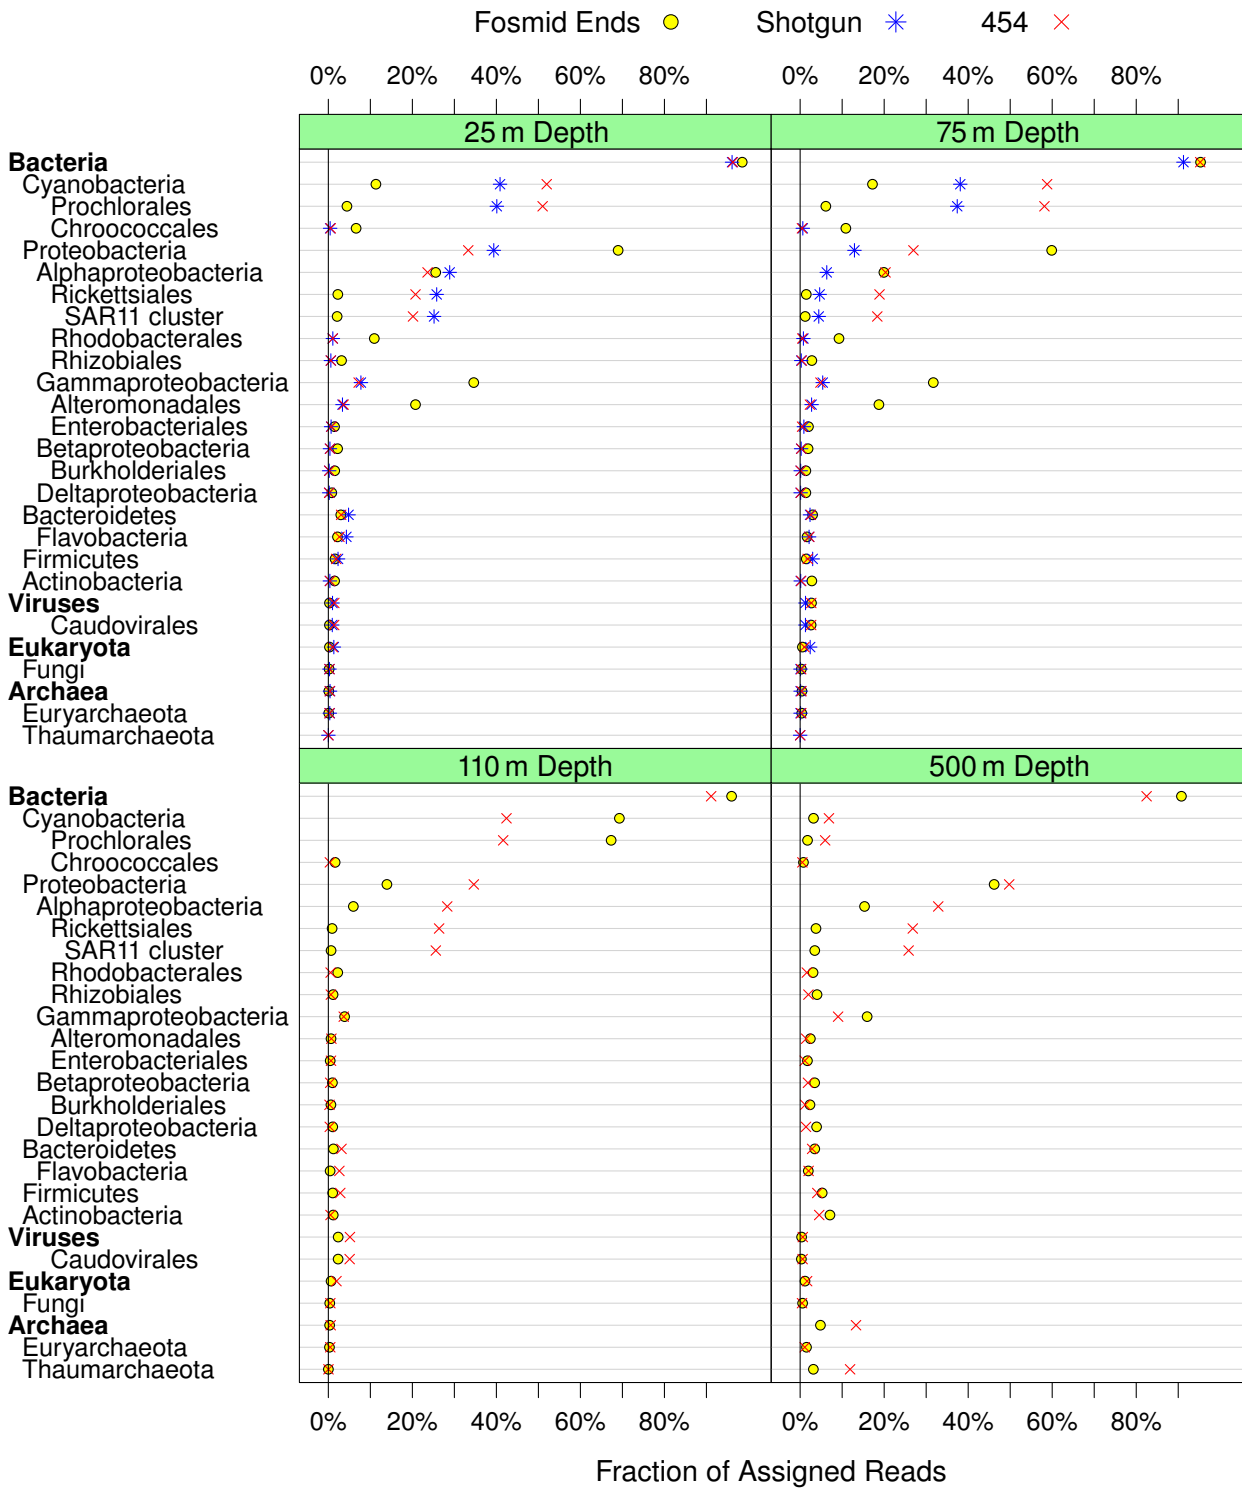

**Supplementary Figure 1** Taxonomic comparison of libraries in HOT 179, analyzed using blastx. A representative subset of taxa is shown and their indentations reflect the hierarchical rank in the NCBI taxonomy. The number of reads assigned to each taxon, including its child taxa, is displayed as percentage of all successfully assigned reads in the library.

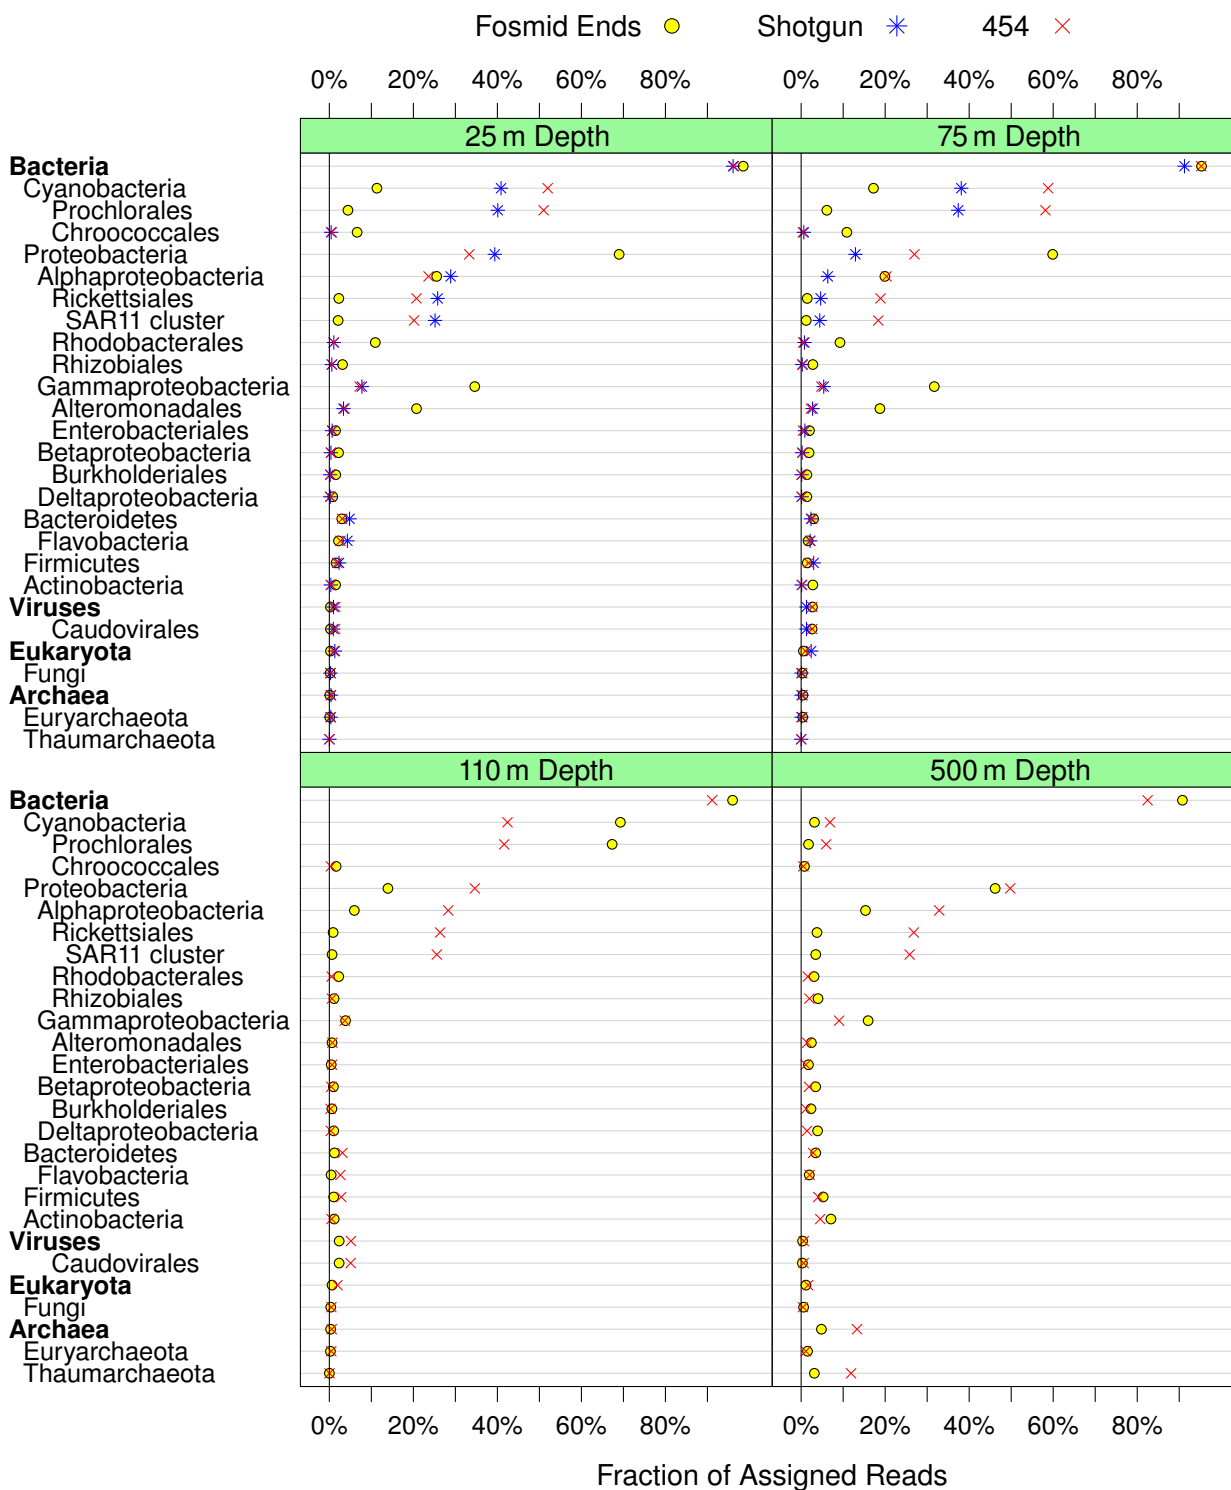

**Supplementary Figure 2** Taxonomic comparison of libraries in HOT 186, analyzed using blastn. A representative subset of taxa is shown and their indentations reflect the hierarchical rank in the NCBI taxonomy. The number of reads assigned to each taxon, including its child taxa, is displayed as percentage of all successfully assigned reads in the library.



**Supplementary Figure 3** Taxonomic comparison of libraries in HOT 186, analyzed using blastx. A representative subset of taxa is shown and their indentations reflect the hierarchical rank in the NCBI taxonomy. The number of reads assigned to each taxon, including its child taxa, is displayed as percentage of all successfully assigned reads in the library.

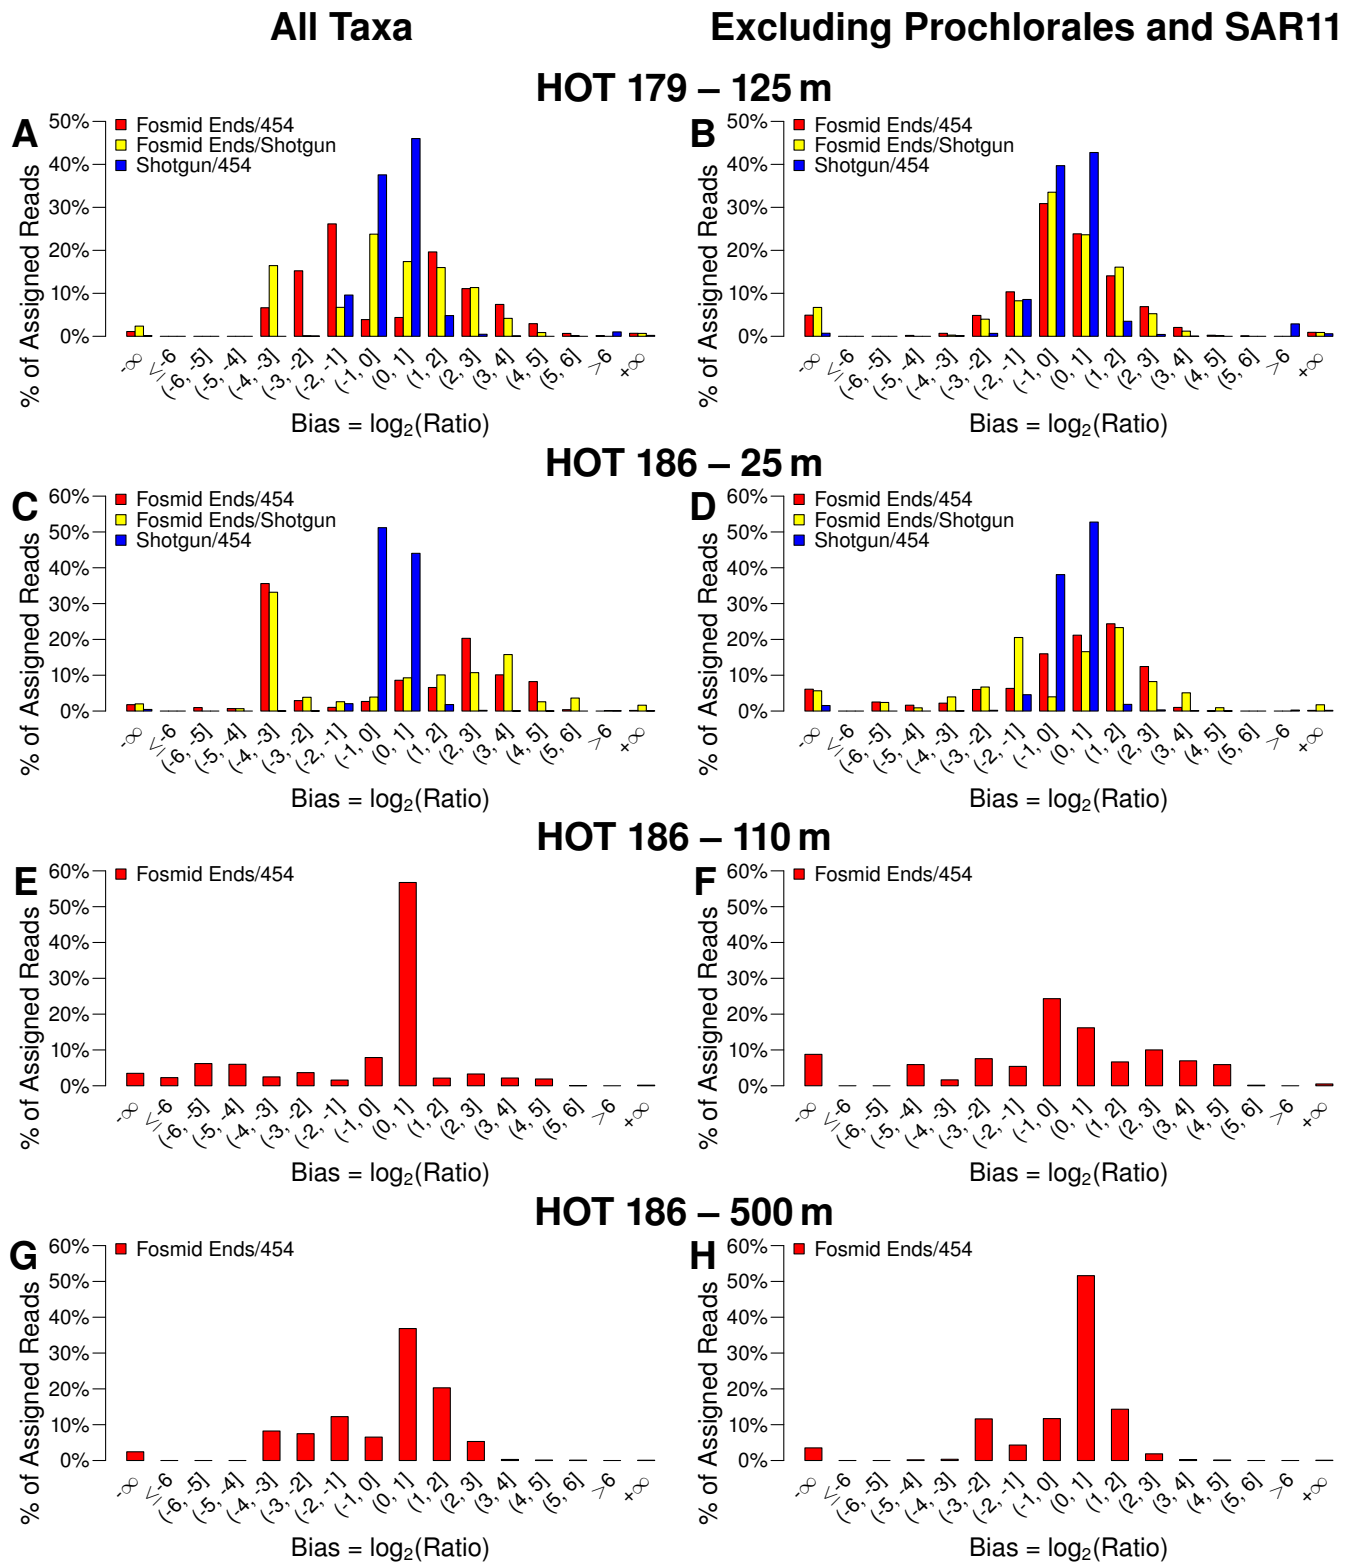

**Supplementary Figure 4** Distribution of the bias measure in pairwise comparisons of library types, using *blastn* analysis results. Positive and negative infinity of the bias reflect the absence of some taxa in one of the libraries. The colors of the histogram bars are indicative of the library types being compared. The *y*-axis shows the percentage of reads assigned to taxa falling into the respective bias interval, averaged over both libraries.

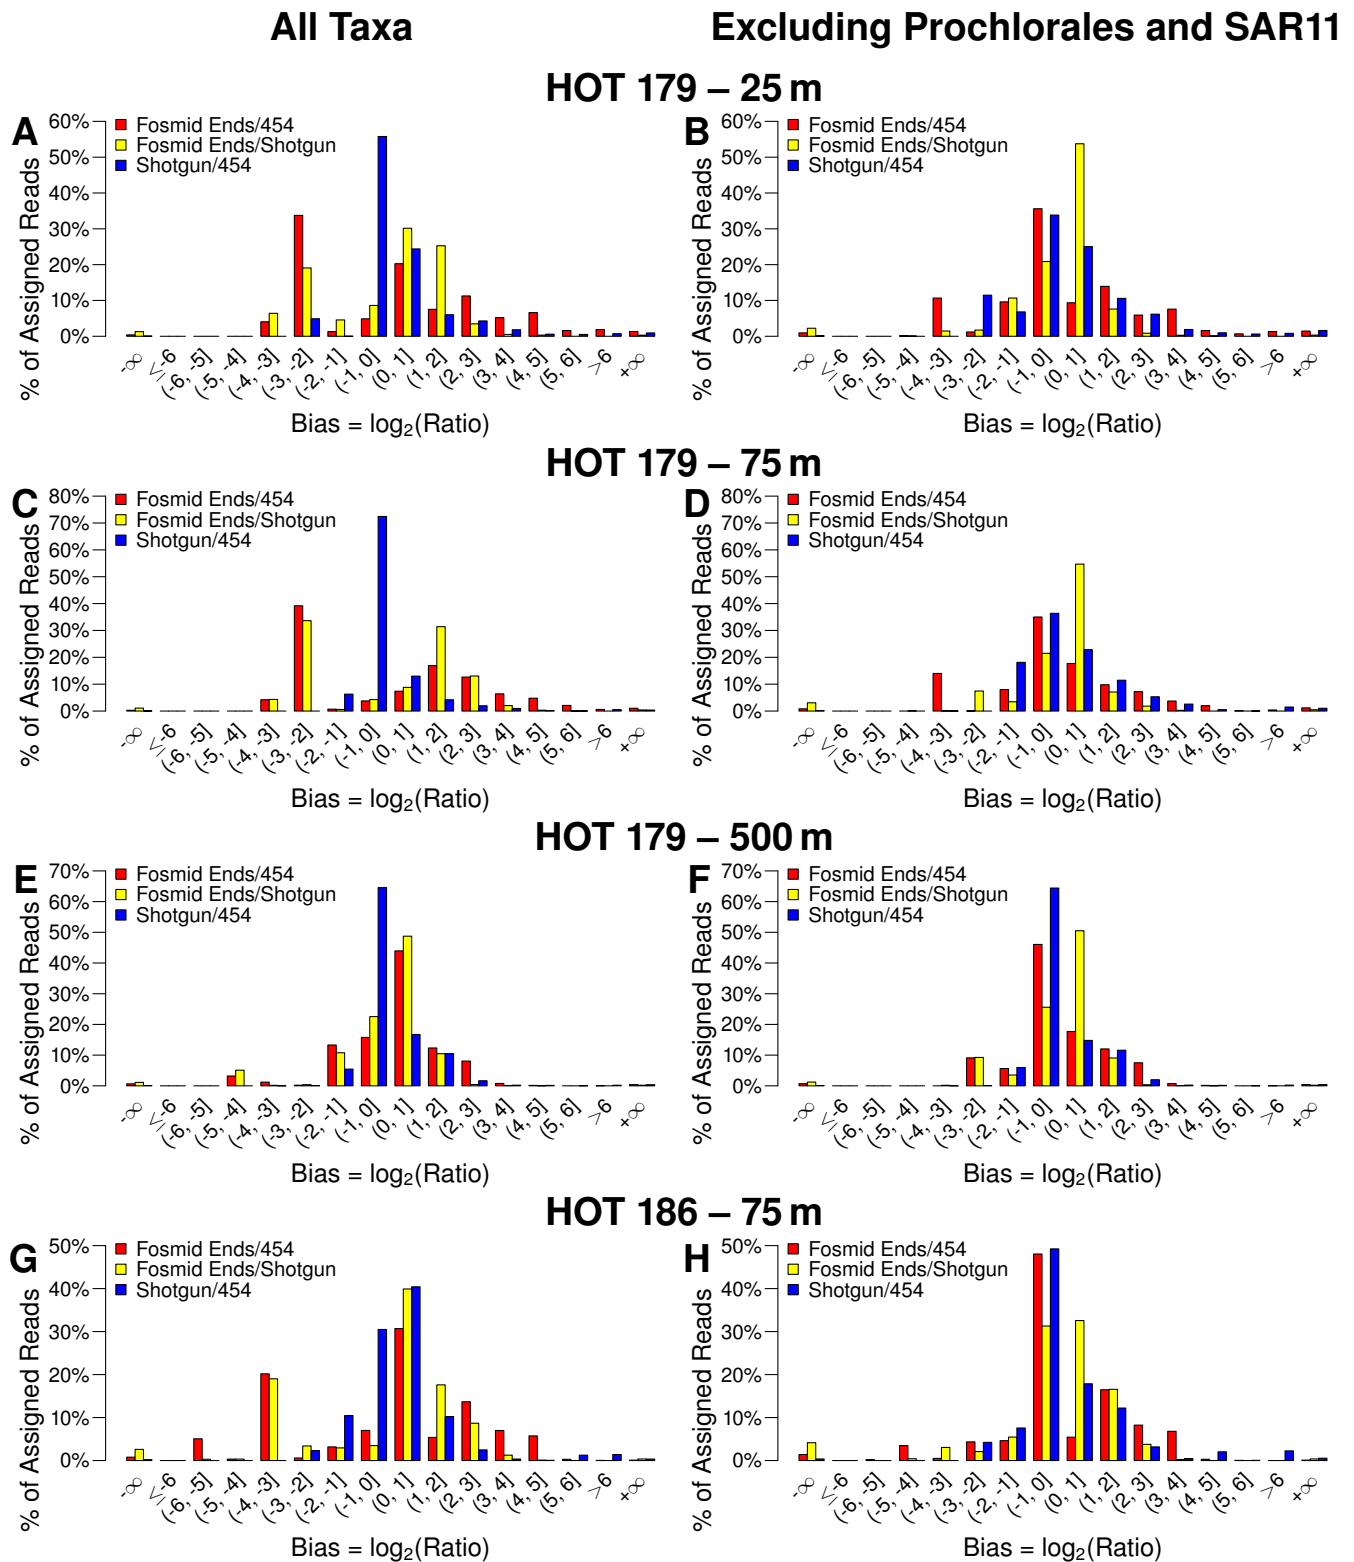

**Supplementary Figure 5** Distribution of the bias measure in pairwise comparisons of library types, using *blastx* analysis results. Positive and negative infinity of the bias reflect the absence of some taxa in one of the libraries. The colors of the histogram bars are indicative of the library types being compared. The *y*-axis shows the percentage of reads assigned to taxa falling into the respective bias interval, averaged over both libraries.

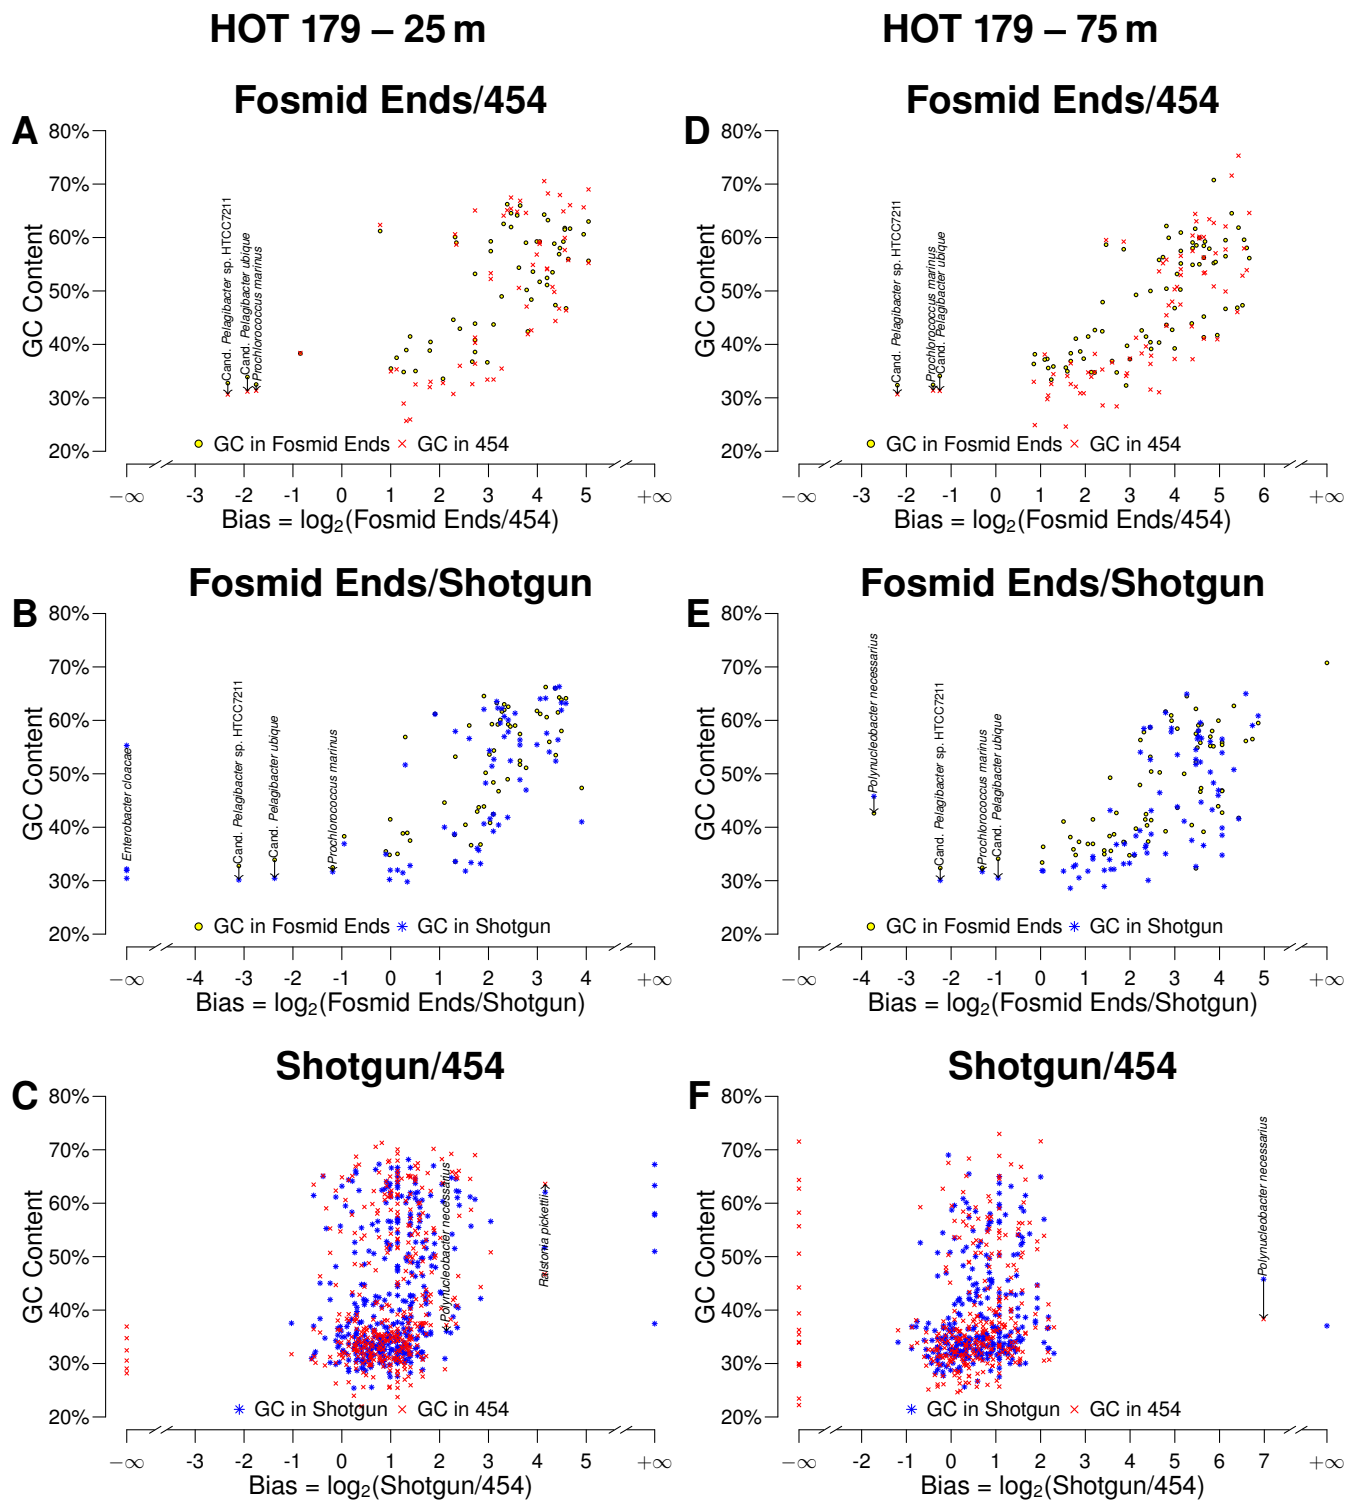

**Supplementary Figure 6** GC contents plotted versus bias for pairwise library comparisons of HOT 179 25 m and 75 m blastn results. Each taxon is represented by two symbols, one for the GC content in each library. Taxa with less than 5 reads in each library are only shown if they are not represented at all in one library (infinite bias measure), where their expected representation based on their percentage in the other library would be at least 2 reads.



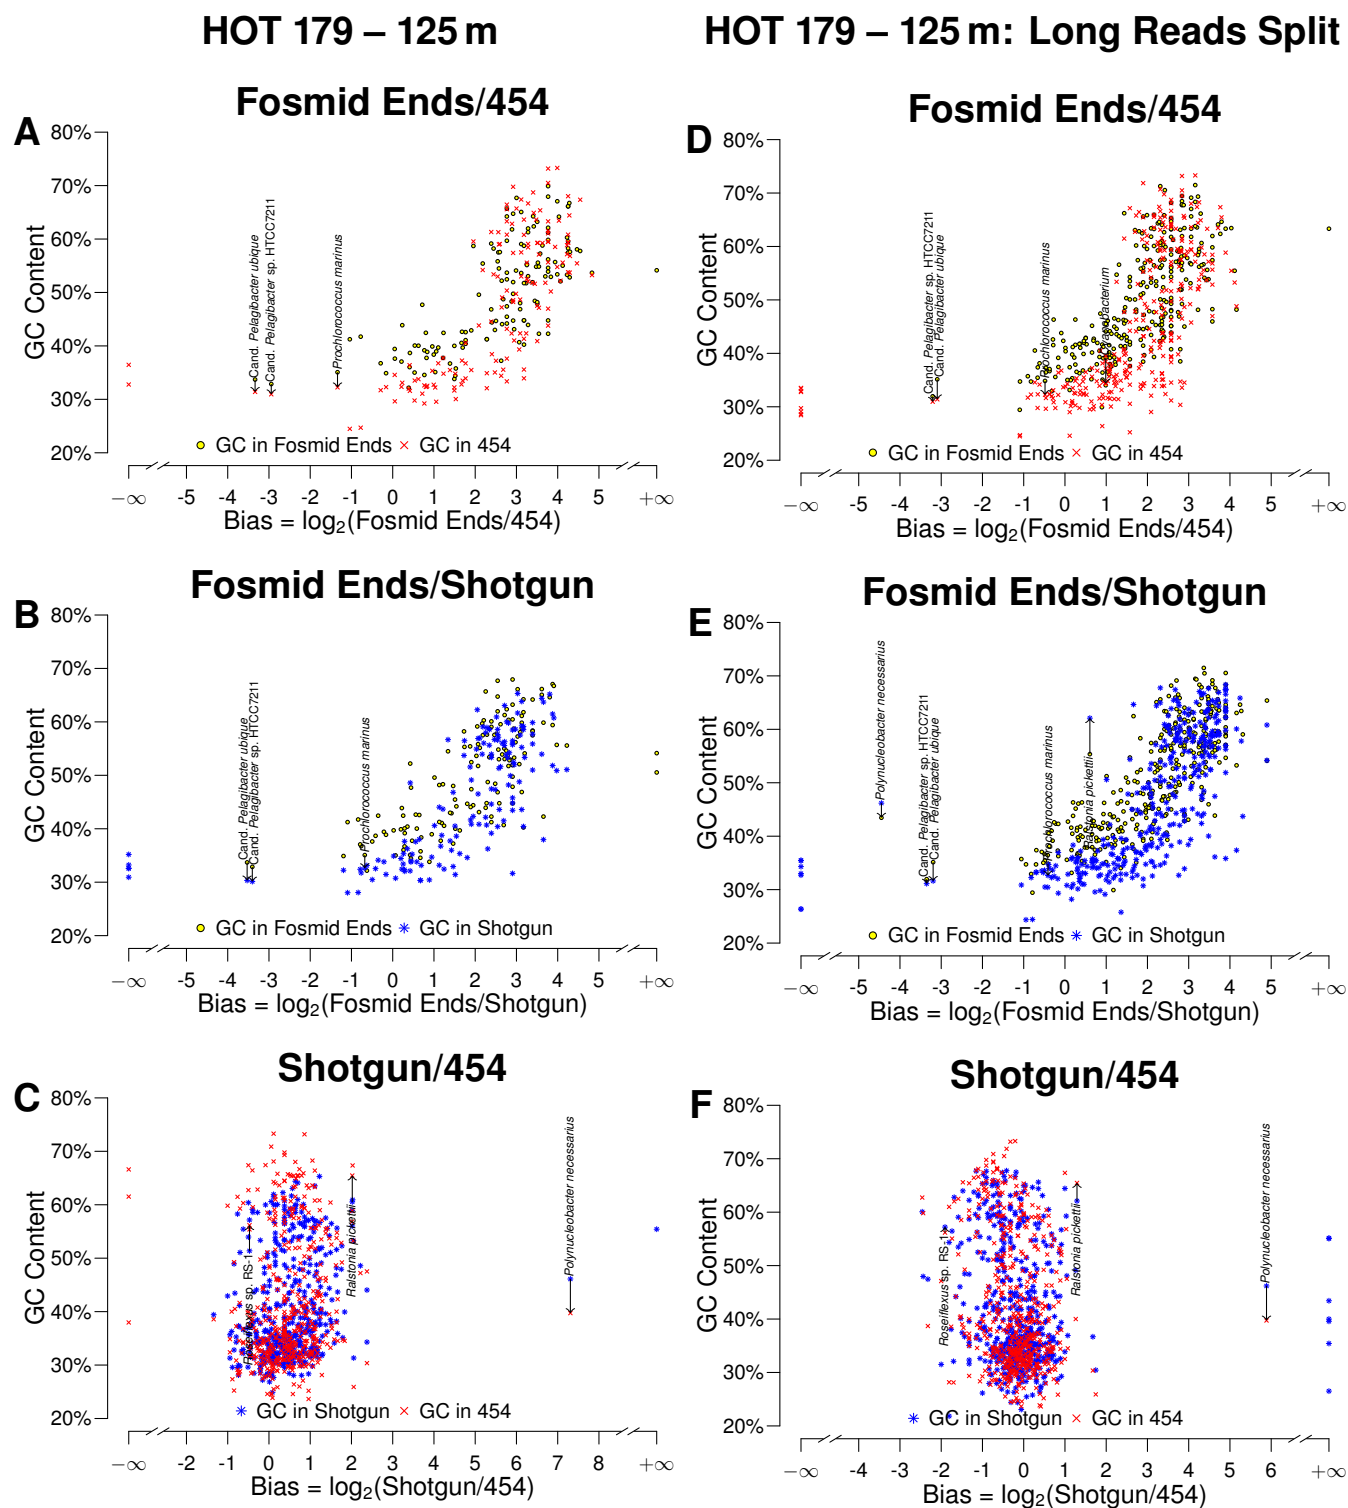

**Supplementary Figure 7** GC contents plotted versus bias for pairwise library comparisons of HOT 179–125 m *blastn* results. Panels A–C show the original data. In D–F the fosmid and shotgun sequences were randomly split before the analysis, to yield a length distribution of with a mean of 108.8 nt (equivalent to 454 sequences). Each taxon is represented by two symbols, one for the GC content in each library. Taxa with less than 5 reads in each library are only shown if they are not represented at all in one library (infinite bias measure), where their expected representation based on their percentage in the other library would be at least 2 reads. In D–F the split yielded multiple BLAST hits for many original reads, resulting in more taxa with read numbers above the cutoff.

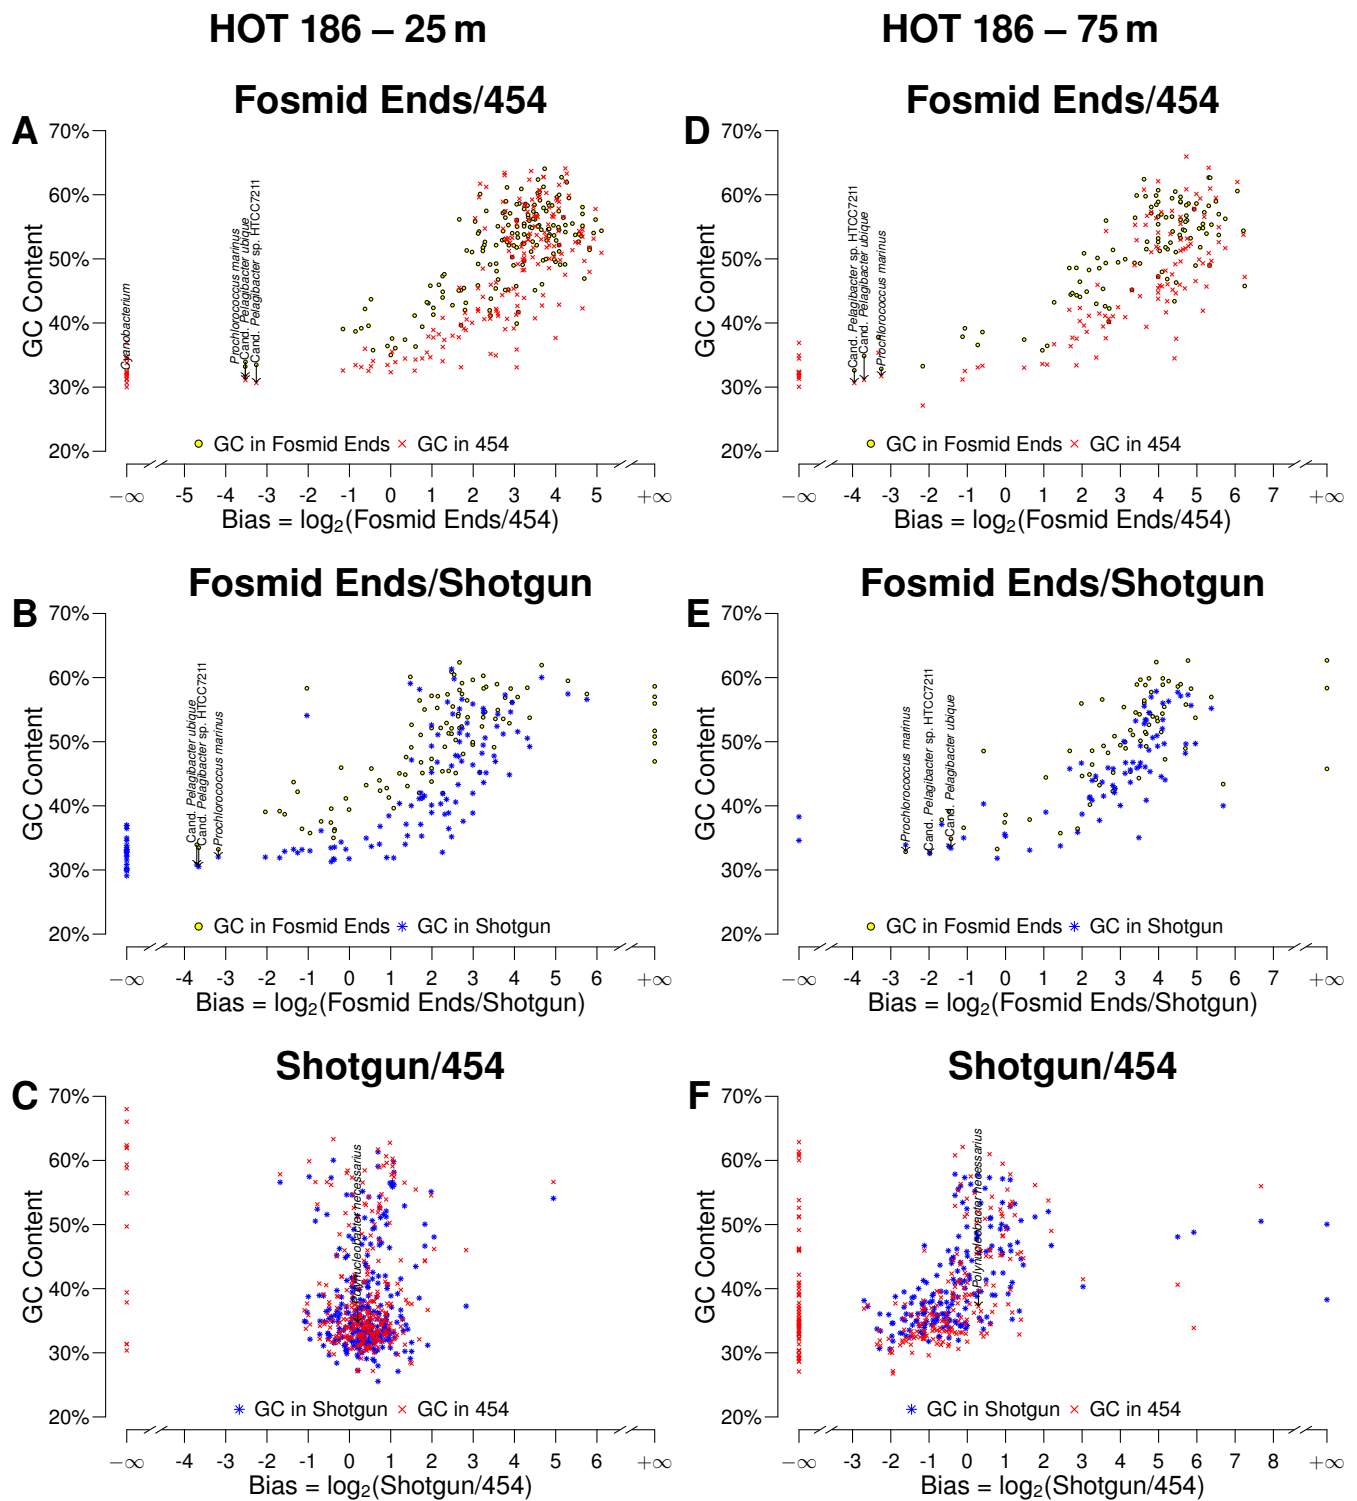

**Supplementary Figure 8** GC contents plotted versus bias for pairwise library comparisons, for HOT 186–25 m and 75 m blastn results. Each taxon is represented by two symbols, one for the GC content in each library. Taxa with less than 5 reads in each library are only shown if they are not represented at all in one library (infinite bias measure), where their expected representation based on their percentage in the other library would be at least 2 reads.

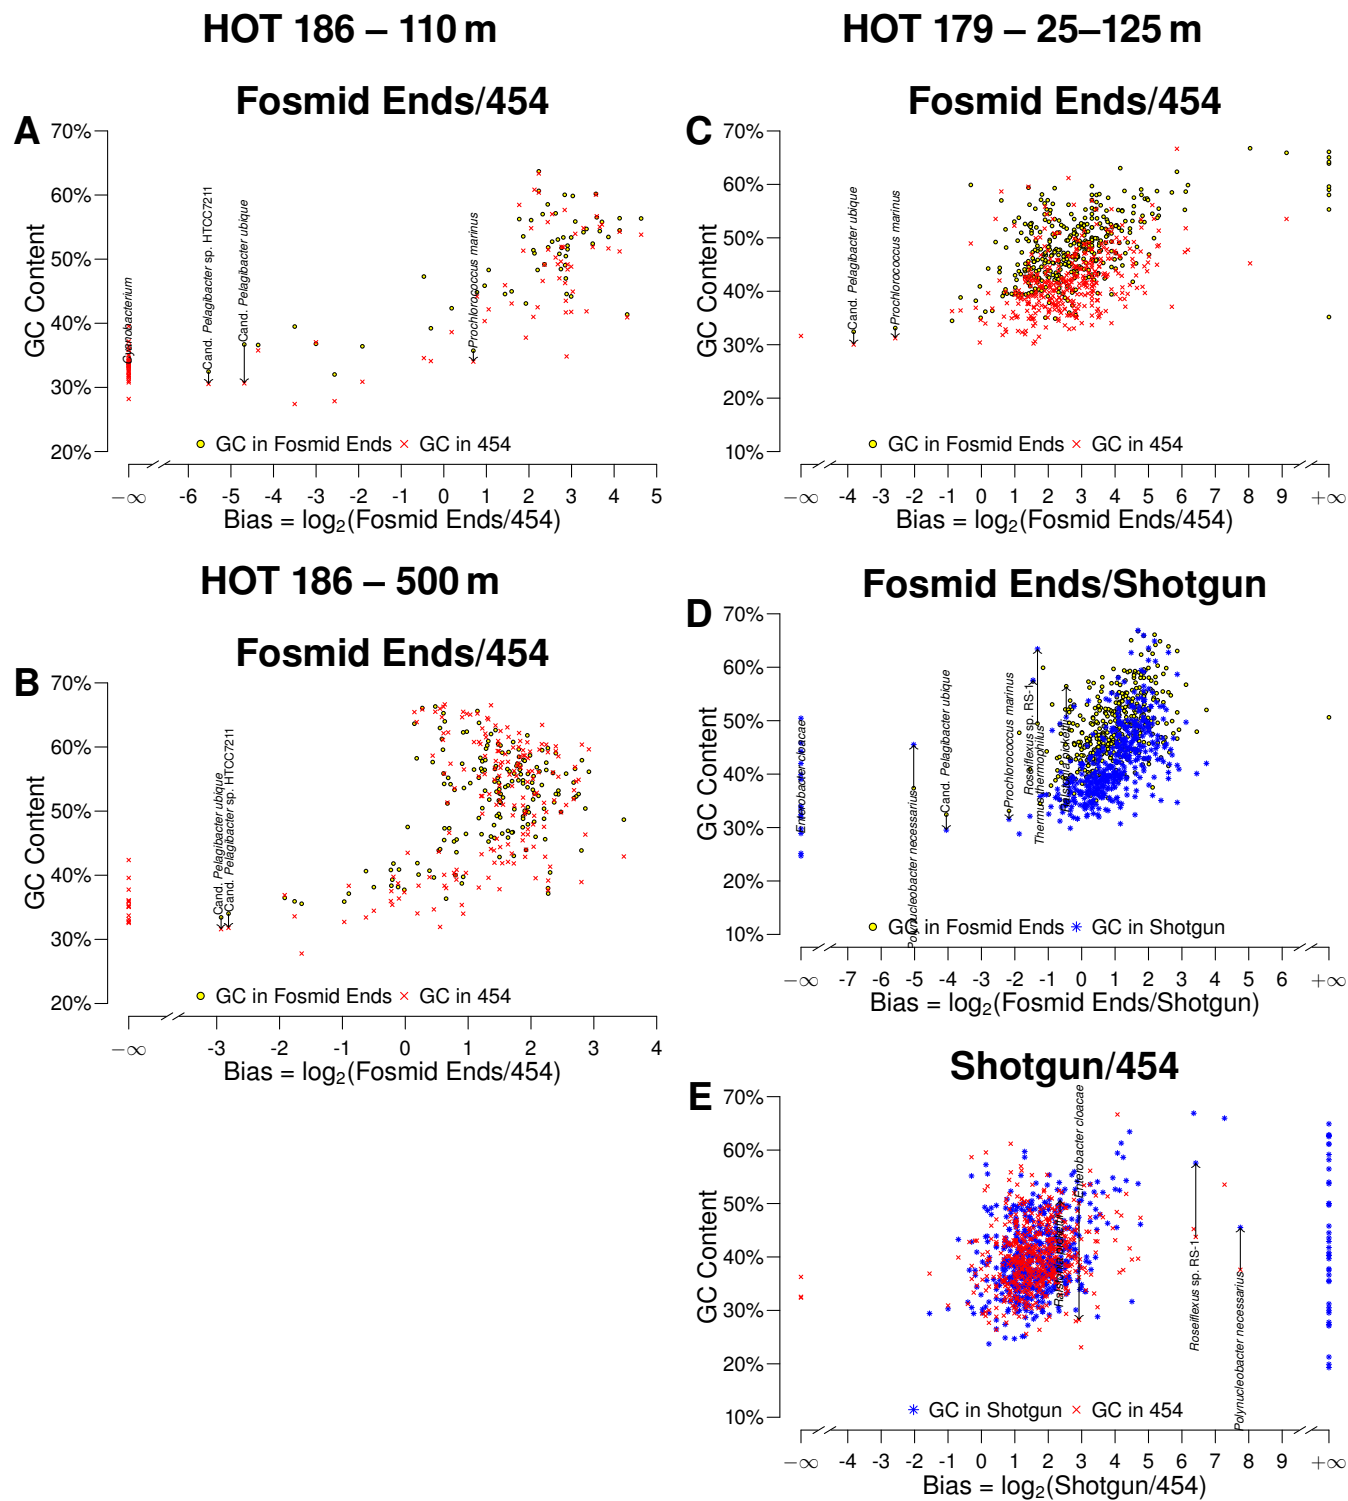

**Supplementary Figure 9** GC contents plotted versus bias for pairwise library comparisons. Panels A and B show the *blastn* results for HOT 186, 110 m and 500 m, respectively. C–E show the combined photic zone of HOT 179, using *blastx* data. Each taxon is represented by two symbols, one for the GC content in each library. Taxa with less than 5 reads in each library are only shown if they are not represented at all in one library (infinite bias measure), where their expected representation based on their percentage in the other library would be at least 2 reads.
